# Supplementary material for: Rfx6 Maintains the Functional Identity of Adult Pancreatic β Cells
Source: PubMed Central journal article supplement (PMC4542305; doi:10.1016/j.celrep.2014.11.033), 2014-12-11
Supplement: mmc2.pdf [file mmc2.pdf]

# Cell Reports

## Rfx6 Maintains the Functional Identity of Adult Pancreatic $\beta$ Cells

### Graphical Abstract

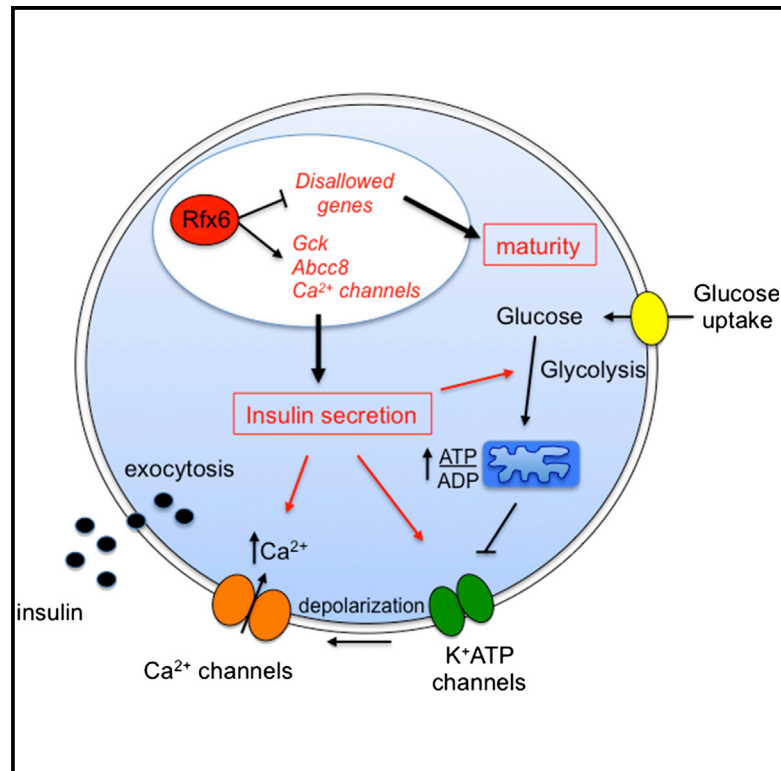

### Highlights

- Inactivation of Rfx6 in adult  $\beta$  cells leads to impaired insulin secretion
- Glucose-induced  $\text{Ca}^{2+}$  influx is reduced in  $\beta$  cells lacking Rfx6
- Rfx6 activates components of the insulin secretion pathway
- Rfx6 maintains  $\beta$  cell maturity by repressing “disallowed” genes

### Authors

Julie Piccand, Perrine Strasser, ...,  
Guy A. Rutter, Gérard Gradwohl

### Correspondence

gradwohl@igbmc.fr

### In Brief

Rfx6 transcription factor is critical for the development of pancreatic  $\beta$  cells, and Rfx6 mutations cause neonatal diabetes in humans. Using adult  $\beta$  cell deletion of Rfx6, Piccand et al. show that Rfx6 controls glucose homeostasis and maintains the differentiated state by activation of the insulin secretory pathway and repression of disallowed genes, a group of genes selectively repressed in mature  $\beta$  cells.

### Accession Numbers

GSE59622  
GSE62844

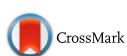

# Rfx6 Maintains the Functional Identity of Adult Pancreatic $\beta$ Cells

Julie Piccand,<sup>1</sup> Perrine Strasser,<sup>1</sup> David J. Hodson,<sup>2</sup> Aline Meunier,<sup>1</sup> Tao Ye,<sup>1</sup> Céline Keime,<sup>1</sup> Marie-Christine Birling,<sup>3</sup> Guy A. Rutter,<sup>2</sup> and Gérard Gradwohl<sup>1,\*</sup>

<sup>1</sup>Institut de Génétique et de Biologie Moléculaire et Cellulaire, Institut National de la Santé et de la Recherche Médicale U964, Centre National de Recherche Scientifique UMR7104, Université de Strasbourg, Illkirch 67404, France

<sup>2</sup>Section of Cell Biology, Division of Diabetes, Endocrinology and Metabolism, Department of Medicine, Imperial College London, Hammersmith Hospital, du Cane Road, London W12 0NN, UK

<sup>3</sup>Institut Clinique de la Souris-ICS-MCI, PHENOMIN, Illkirch 67404, France

\*Correspondence: [gradwohl@igbmc.fr](mailto:gradwohl@igbmc.fr)

<http://dx.doi.org/10.1016/j.celrep.2014.11.033>

This is an open access article under the CC BY license (<http://creativecommons.org/licenses/by/3.0/>).

## SUMMARY

Increasing evidence suggests that loss of  $\beta$  cell characteristics may cause insulin secretory deficiency in diabetes, but the underlying mechanisms remain unclear. Here, we show that Rfx6, whose mutation leads to neonatal diabetes in humans, is essential to maintain key features of functionally mature  $\beta$  cells in mice. Rfx6 loss in adult  $\beta$  cells leads to glucose intolerance, impaired  $\beta$  cell glucose sensing, and defective insulin secretion. This is associated with reduced expression of core components of the insulin secretion pathway, including glucokinase, the Abcc8/SUR1 subunit of  $K_{ATP}$  channels and voltage-gated  $Ca^{2+}$  channels, which are direct targets of Rfx6. Moreover, Rfx6 contributes to the silencing of the vast majority of “disallowed” genes, a group usually specifically repressed in adult  $\beta$  cells, and thus to the maintenance of  $\beta$  cell maturity. These findings raise the possibility that changes in Rfx6 expression or activity may contribute to  $\beta$  cell failure in humans.

## INTRODUCTION

The mammalian pancreas comprises an exocrine compartment, secreting digestive enzymes into the intestine, and an endocrine compartment, secreting hormones in the bloodstream. Pancreatic endocrine cells are grouped in small clusters of cells, the islets of Langerhans, containing different cell types secreting distinct hormones. Islet cells include  $\beta$  cells, which secrete insulin, the hormone stimulating glucose uptake in peripheral tissues. Briefly, glucose enters  $\beta$  cells by facilitated diffusion and, after phosphorylation by glucokinase (Lynedjian, 1993), is metabolized by aerobic glycolysis (Sekine et al., 1994), producing metabolic signals such as a rise in ATP/ADP concentration (Tarasov et al., 2012). The latter in turn closes ATP-sensitive  $K^+$  channels, causing membrane depolarization and the subsequent opening of voltage-gated  $Ca^{2+}$  channels (Yang and Berggren, 2006).

$Ca^{2+}$  influx then stimulates the exocytosis of insulin granules (Rutter, 2004).

Diabetes is a chronic metabolic disease characterized by hyperglycemia due to defective insulin secretion, insulin action, or both.  $\beta$  cells are lacking in type 1 diabetes, while in type 2 diabetic patients,  $\beta$  cells cannot compensate for the increased insulin demand due to their reduced capacity to secrete insulin in response to high blood glucose. Alterations in both  $\beta$  cell mass (Butler et al., 2003; Marselli et al., 2013; Rahier et al., 2008) and function (Rosengren et al., 2012) are likely to contribute to the overall secretory deficiency observed in type 2 diabetes (Rutter, 2014). Recently, it has been proposed that  $\beta$  cell dysfunction in type 2 diabetes might also result from a mechanism of dedifferentiation, which would compromise  $\beta$  cell function (Talchai et al., 2012) and contribute to the development of the disease together with cell death and decreased  $\beta$  cell mass. This hypothesis, which builds on earlier findings (Jonas et al., 1999), has been based on the observation that ablation of FoxO1 transcription factor in adult  $\beta$  cells in mice caused hyperglycemia with a concomitant reversion of  $\beta$  cells to a progenitor- or  $\alpha$ -like state. Along the same lines, additional loss-of-function studies in adult  $\beta$  cells revealed that NeuroD1 (Gu et al., 2010), Nkx6.1 (Taylor et al., 2013), or Pdx1 (Gao et al., 2014) transcription factors are important to maintain the maturity and differentiated state as well as the insulin-secretive function of  $\beta$  cells. Thus, it appears that the loss of key  $\beta$  cell transcription factors results in the loss of both  $\beta$  cell identity and function.

Rfx6 is a winged-helix transcription factor that has been shown to be essential for islet cell development in zebrafish (Soyer et al., 2010), *Xenopus* (Pearl et al., 2011), mice (Smith et al., 2010), and humans (Concepcion et al., 2014; Pearl et al., 2011; Smith et al., 2010; Spiegel et al., 2011). Rfx6 null mice lack all endocrine cells (excepting PP cells), including  $\beta$  cells, and die shortly after birth. It was thus concluded that Rfx6 is necessary for insulin production during embryogenesis (Smith et al., 2010). In humans, mutations in RFX6 have been reported to be the cause of the Mitchell-Riley syndrome, an autosomal-recessive syndrome of neonatal diabetes and small bowel atresia, often associated with intestinal malabsorption (Concepcion et al., 2014; Smith et al., 2010; Spiegel et al., 2011). Clusters

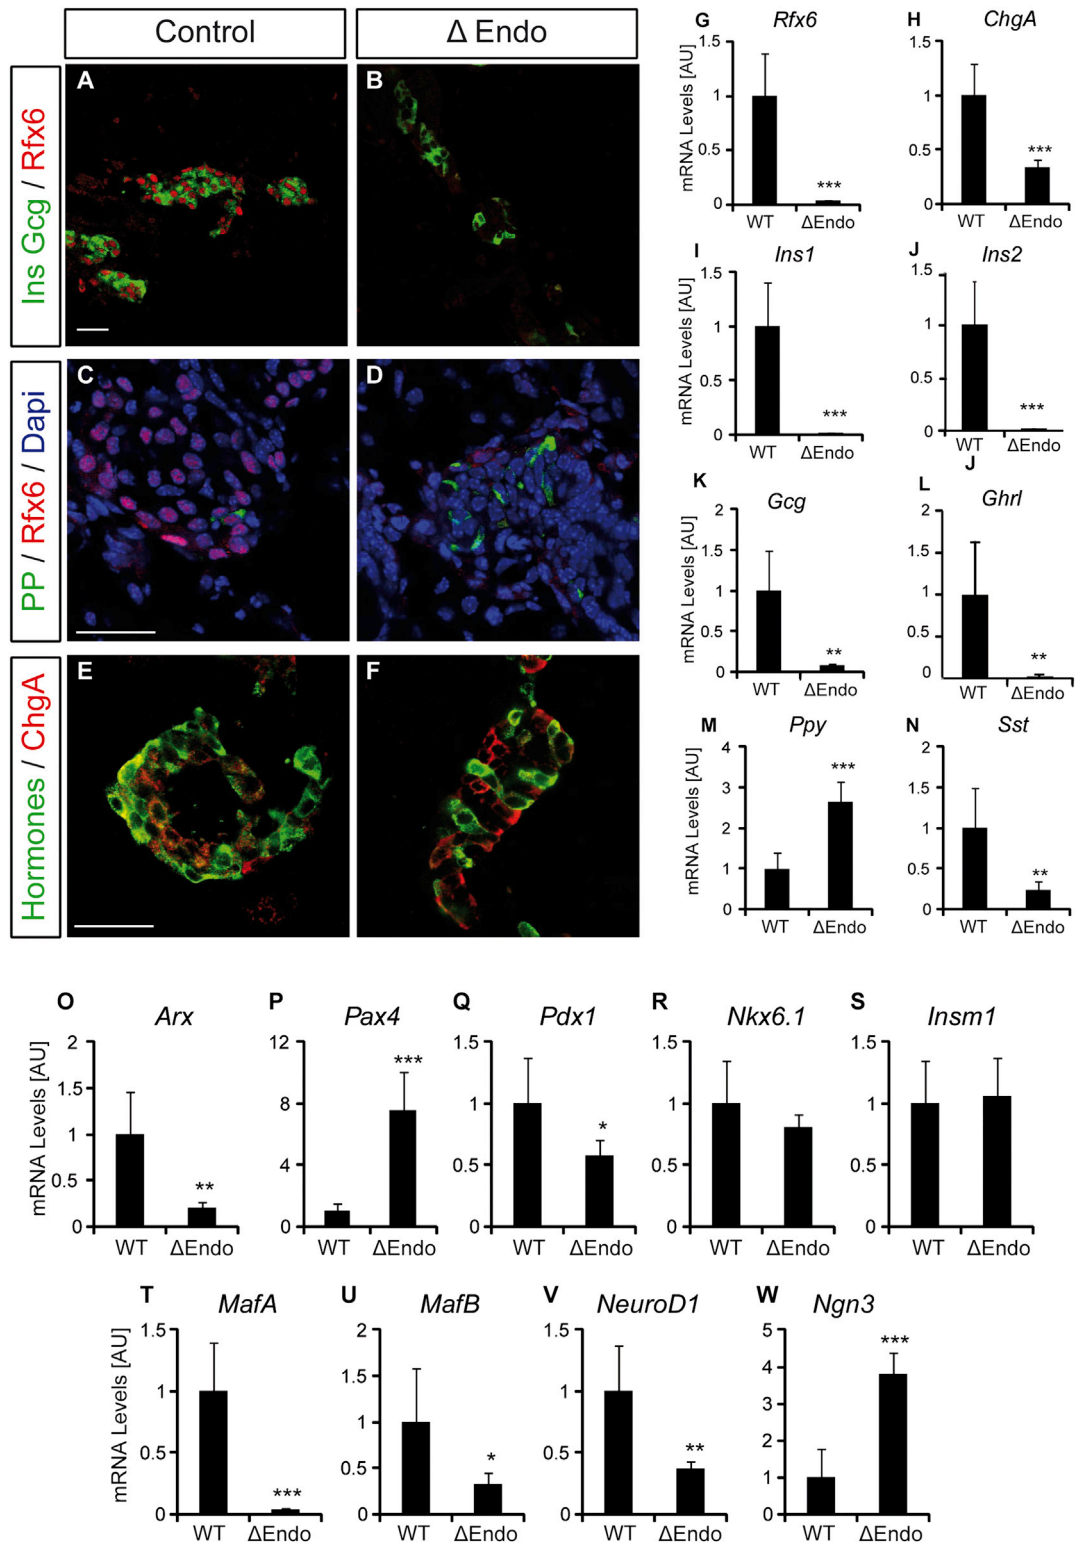

**Figure 1. Deletion of *Rfx6* Downstream of *Ngn3* Results in the Loss of Insulin-, Glucagon-, Somatostatin-, and Ghrelin-Producing Islet Cells in Newborn Mice**

(A–F) Immunofluorescence experiments on pancreata from controls and *Rfx6* <sup>$\Delta$ Endo</sup> pups at postnatal day 0 (P0). Staining for insulin and glucagon (green) and *Rfx6* (red) showing efficient deletion of *Rfx6* and strong reduction of insulin- and glucagon-expressing cells in *Rfx6* <sup>$\Delta$ Endo</sup> mutants (A and B). (B) and (F) show very rare

(legend continued on next page)

of chromogranin A-positive hormone-negative cells have been reported in the pancreas of several patients, suggesting a critical role for RFX6 in the formation of islet and  $\beta$  cells in humans. The complex spatiotemporal expression pattern of Rfx6 in mice, namely its broad expression very early in the gut and pancreas endoderm and then its restriction to developing endocrine cells in the embryo and its maintenance in adult islets, including  $\beta$  cells (Smith et al., 2010; Soyer et al., 2010), suggests multiple functions at different stages and in different organs. Thus, the phenotype of Rfx6 null mice might result from multiple deficiencies during development. Importantly, the postnatal lethality of Rfx6<sup>-/-</sup> pups precluded the study of Rfx6 function in adult  $\beta$  cells. Therefore, to decipher the multiple functions of Rfx6, we generated a floxed allele. Conditional inactivation of Rfx6 in developing endocrine cells phenocopies the null phenotype, demonstrating that Rfx6 controls islet development downstream of the proendocrine transcription factor Ngn3. Conditional inactivation of Rfx6 in adult  $\beta$  cells led to insulin secretion deficiency and glucose intolerance, although insulin was still produced. Removal of Rfx6 perturbs key molecular traits of functional  $\beta$  cells with the reduction in expression of glucokinase, the ATP-sensitive K<sup>+</sup> channel *Abcc8/SUR1*, as well as eight voltage-gated Ca<sup>2+</sup> channel genes, some of which are direct targets of Rfx6. Collectively, lowered levels of these core components of the insulin secretion pathway seem likely to underlie defective insulin secretion. Unexpectedly, we found that inactivation of Rfx6 in adult  $\beta$  cells caused the re-expression of the “disallowed” genes (Pullen et al., 2010; Quintens et al., 2008; Thorrez et al., 2011), a set of genes expressed normally in most (if not all) mammalian tissue but selectively and highly repressed in mouse mature  $\beta$  cells. This finding reveals a common repression mechanism of disallowed gene expression in  $\beta$  cells involving a unique transcription factor. Taken together, our data show that Rfx6 inactivation in  $\beta$  cells causes decreased expression of  $\beta$  cell-specific genes combined with the upregulation of disallowed genes, a feature of immature  $\beta$  cells, demonstrating that Rfx6 can act as an activator or repressor of transcription. Thus, the present study demonstrates that Rfx6 is essential for the maintenance of the differentiated state and functional identity of adult  $\beta$  cells. Therefore, Rfx6 might be an interesting target should “ $\beta$  cell-identity drugs” be developed in the future as a novel therapeutic strategy in type 2 diabetes.

## RESULTS

### Rfx6 Is Essential for $\beta$ Cell Differentiation Downstream of the Proendocrine Transcription Factor Ngn3

To decipher the different roles of Rfx6, we generated a conditional knockout mouse by flanking exon 3, which encodes a part of the DNA binding domain, by two loxP sites, generating a null allele (Figure S1). To determine the role of Rfx6 specif-

ically in the endocrine lineage and circumvent any effect of a possible endodermal function, we first generated Rfx6 <sup>$\Delta$ Endo</sup> mutant animals by crossing Rfx6<sup>fl/fl</sup> mice with Ngn3-Cre mice (Yoshida et al., 2004). Rfx6 is efficiently deleted in Rfx6 <sup>$\Delta$ Endo</sup> pancreas (Figure 1G), and like the full-body knockout, Rfx6 <sup>$\Delta$ Endo</sup> pups are diabetic and die between 2 and 3 days after birth (not shown). *Ins1*, *Ins2*, *Gcg*, *Sst*, and *Ghr* mRNAs are strongly decreased, while the amount of *Ppy* transcripts is increased (Figures 1I–1N). Accordingly, the differentiation of hormone-expressing cells was strongly impaired (except for PP), as insulin- glucagon- or somatostatin-expressing cells are hardly found (Figures 1A–1D). However, although the overall amount of *ChgA* mRNA is decreased (Figure 1H), an endocrine program has been implemented since chromogranin A-positive but hormone-negative cells are found (Figures 1E and 1F). We further characterized the role of Rfx6 downstream of Ngn3 by exploring the expression levels of several important transcription factors controlling islet cell fate and maturation. Interestingly, *Ngn3* transcripts were elevated 4-fold in the pancreas of Rfx6 <sup>$\Delta$ Endo</sup> mutants at birth, suggesting that after being induced by Ngn3 in endocrine progenitors, Rfx6 would in turn repress *Ngn3* in developing islet cells or that the number of Ngn3 cells increases (Figure 1W). Cell quantification did not validate the later hypothesis (not shown). *Arx* transcripts are low, while those encoding *Pax4* are increased (Figures 1O and 1P). Thus, as proposed for the full knockout at embryonic stages (Smith et al., 2010), Rfx6 might control islet subtype specification by repressing the  $\beta$  fate while promoting  $\alpha$  destiny in Rfx6 <sup>$\Delta$ Endo</sup> mice (see Discussion). This increase in *Pax4* was, however, not sufficient to induce  $\beta$  cell development, because the expression of key regulators of insulin transcription (*Pdx1*, *MafA*, *NeuroD1*) as well as *Ins1* was reduced (Figures 1Q, 1T, and 1V). Together, and as reported in Rfx6 null embryos (Smith et al., 2010), Rfx6 <sup>$\Delta$ Endo</sup> newborns almost entirely lack insulin-positive cells. These findings demonstrate that it is Rfx6 function, downstream of Ngn3, that is essential for  $\beta$  cell generation and that impaired  $\beta$  cell development does not result from defective endoderm.

### Rfx6 Is Not Absolutely Necessary for Insulin Production in the Adult Mouse Pancreas

Rfx6 expression is maintained in adult islets, including  $\beta$  cells, suggesting a role in  $\beta$  cell function (Smith et al., 2010; Soyer et al., 2010). Because of the postnatal lethality of Rfx6<sup>-/-</sup> and Rfx6 <sup>$\Delta$ Endo</sup> mutants, we generated Rfx6<sup>fl/fl</sup>; *Ins1*-CreER<sup>T2</sup> mice (called hereafter Rfx6 <sup>$\Delta$ beta</sup>) to determine the role of Rfx6 in adult  $\beta$  cells. All subsequent experiments, to address the role of Rfx6 in adult  $\beta$  cells, were performed with 8- to 10-week-old mice (age of tamoxifen treatment). *Ins1*-CreER<sup>T2</sup> mice specifically and efficiently delete floxed alleles in  $\beta$  cells upon tamoxifen treatment (Figure S2). Similarly, in Rfx6 <sup>$\Delta$ beta</sup> mice, Rfx6 is efficiently deleted (95%) as early as 5 days after

sections where hormone-positive cells were found. Staining for PP (green) and Rfx6 (red) revealed that PP is not dependent on Rfx6 (C and D). Staining for hormones (insulin, glucagon, PP, somatostatin) in green and the panendocrine marker chromogranin A in red show that chromogranin A-positive endocrine cells, which do not express any of the islet hormones, are found in the pancreas of Rfx6 <sup>$\Delta$ Endo</sup> pups (E and F). (G–W) qRT-PCR experiments for Rfx6, hormones, and transcription factors controlling islet cell development in Rfx6 <sup>$\Delta$ Endo</sup> pups and wild-type controls at P0. Scale bars, 50  $\mu$ M. Data are presented as mean  $\pm$  SD on n = 4 samples; \*\*\*p < 0.001, \*\*p < 0.01, \*p < 0.05.



the first tamoxifen injection as shown by quantitative RT-PCR (qRT-PCR) on whole islets (Figures 2G and S2) and specifically in insulin-positive  $\beta$  cells (Figures 2A, 2B, and S2). Although *Ins1* transcripts were reduced by ~54%–65% (Table S1; Figure 2H), but not *Ins2* (Table S1), insulin peptide, as well as c-peptide 1 and 2, are still detected in  $\beta$  cells lacking Rfx6 as late as 3 weeks after tamoxifen injections (Figures 2A–2F). In agreement with these observations, Rfx6 $\Delta^{\text{Beta}}$  mice do not develop overt diabetes. Detection of insulin hormone in Rfx6 $\Delta^{\text{Beta}}$  islets was surprising, because a previous study suggested that Rfx6 was necessary for insulin production in the embryonic pancreas (Smith et al., 2010). Using quantitative chromatin immunoprecipitation (ChIP) in Min6B1 cells (Lilla et al., 2003), we could not reveal any binding of Rfx6 to any of the eight predicted X-boxes in a 10 kb region upstream of *Ins1* gene, while in a control experiment, MafA mapped to the *Ins1* promoter region (not shown). Thus, induced inactivation of Rfx6 in a mature  $\beta$  cell does not preclude the production of insulin hormone.

### Impaired Insulin Secretion and Glucose Intolerance in Rfx6 $\Delta^{\text{Beta}}$ Mice

To determine whether glucose homeostasis was perturbed in Rfx6 $\Delta^{\text{Beta}}$  mice, we measured the blood glucose concentration in fasted and ad libitum-fed mice and conducted intraperitoneal (i.p.) and oral (O) glucose tolerance tests (GTT) in 3-month-old males, 1 month after tamoxifen treatment. Basal blood glucose concentration was similar in Rfx6 $\Delta^{\text{Beta}}$  and control mice when either fasted or fed (Figure 3A). After 16 hr fasting, glucose was administered by either i.p. injection or intragastric gavage (2 g/kg body weight). In both conditions, mutant mice displayed significant glucose intolerance (Figures 3B and 3C). Impaired glucose homeostasis in Rfx6 $\Delta^{\text{Beta}}$  mice appears not to be due to defects in  $\beta$  cell mass,  $\alpha$  cell mass, or  $\beta$  cell proliferation under the same conditions (Figure S3). To determine whether the reduced glucose clearance resulted from altered insulin levels, we measured plasma insulin in Rfx6 $\Delta^{\text{Beta}}$  and control mice 5 days after tamoxifen treatment (Figure 3D). In fasted animals, the plasma insulin level in Rfx6 $\Delta^{\text{Beta}}$  and control mice was similar (mean controls = 0.35 ng/ml; mean mutants = 0.37 ng/ml;  $n = 7$ ,  $p > 0.05$ ). However, significant differences were observed following i.p. glucose injection (3 g/kg body weight), as glucose-induced insulin secretion was much less efficient in Rfx6 $\Delta^{\text{Beta}}$  mice (Figure 3D). Both the first- and second-phase responses were reduced in mutant mice. To determine whether the defect was islet autonomous, we purified islets from Rfx6 $\Delta^{\text{Beta}}$  and control adult mice under the same conditions and performed ex vivo glucose-stimulated insulin secretion (GSIS) and KCl-stimulated insulin secretion (KCl-SIS) studies (Figure 3E). The amount of secreted insulin was normalized to the total insulin content, which was identical in controls and mutants (not shown), confirming that Rfx6 is not key for insulin production in adult  $\beta$  cells. Clearly, the extent of insulin secretion in response to a glucose or KCl stimulus was reduced in mutant islets compared with controls. Notably, the altered KCl-induced response suggests that the defective insulin secretion might result from glucose-independent depolarization defects. These results suggest that impaired glucose clearance results from

insulin secretory failure that we detect as early as 1 week after Rfx6 deletion both in vivo and ex vivo (in islets).

### Rfx6 Binds to X-Boxes in the *Gck* and *Abcc8* Genes, and Their Expression Is Strongly Decreased in Rfx6 $\Delta^{\text{Beta}}$ Islets

Next, our goal was to decipher the molecular basis underlying defective insulin secretion and glucose intolerance in Rfx6 $\Delta^{\text{Beta}}$  mice. Therefore, we performed a series of qRT-PCR experiments to measure the expression of key regulators of glucose simulated insulin secretion in islets isolated from mutant or control mice, 5 days after tamoxifen treatment. Importantly, we found that transcripts encoding the key genes *Gck* and *Abcc8* were dramatically reduced (Figures 4A and 4B; Table S1). *Gck* encodes glucokinase, an enzyme that controls the first step of glycolysis and is considered the rate-limiting step in glucose metabolism (Matschinsky, 2005). *Abcc8/SUR1* encodes the regulatory sulphonylurea-binding subunits of the ATP-sensitive K<sup>+</sup> channel (K<sub>ATP</sub> channels) linking glucose metabolism to the electrical activity of  $\beta$  cells (McTaggart et al., 2010). Furthermore, *Ucn3* mRNA, a marker of  $\beta$  cell maturation and also reported to have a positive effect on GSIS (Li et al., 2007), is strongly decreased (Figure 4J). In contrast, the expression of the glucose-facilitated transporter *Slc2a2/Glut2*, the proconvertase *Pcsk1*, and the pore-forming unit of K<sub>ATP</sub> channels (*Kcnj11/Kir6.2*) was not altered (Figures 4C–4E). Among the transcription factors important for  $\beta$  cell function and insulin transcription tested (*MafA*, *Pdx1*, *Nkx6.1*, *Pax6*, and *NeuroD1*), only *NeuroD1* and *Pax6* transcripts were downregulated (Figures 4F–4I; Table S1).

To determine whether Rfx6-regulated genes might be direct targets of Rfx6, we analyzed chromatin immunoprecipitation sequencing (ChIP-seq) experiments performed in the mouse  $\beta$  cell line Min6B1 (Lilla et al., 2003) transfected with hemagglutinin (HA)-tagged Rfx6. One peak was detected in the  $\beta$  cell-specific *Gck* promoter region (Figure 4K) overlapping with Pal1 and Pal2 regions previously demonstrated to contain X-boxes bound by Rfx3 (Ait-Lounis et al., 2010). Similarly, a peak was observed in a conserved region of intron 10 of the *Abcc8* gene (Figure 4L). Quantitative ChIP experiments in nontransfected Min6B1 cells, using an Rfx6 antibody, confirmed that endogenous Rfx6 binds to the *Gck* and *Abcc8* genes, although less strongly to *Gck* (Figures 4M and 4N). Taken together, our results suggest that Rfx6 is a direct positive transcriptional regulator of *Gck* and *Abcc8* and that the downregulation of these genes could impact glucose-stimulated insulin secretion.

### Glucose Fails to Induce Normal Increases in ATP/ADP Ratio and Intracellular Free Ca<sup>2+</sup> in Rfx6 $\Delta^{\text{Beta}}$ Mice

Given the abnormalities in glucose-stimulated insulin secretion and gene expression described above, we next explored the possibility that signal generation by the sugar may be impaired in Rfx6 null  $\beta$  cells. Examined using functional multicellular imaging within intact islets (Hodson et al., 2013, 2014a), both phases of the intracellular calcium ([Ca<sup>2+</sup>]<sub>i</sub>) response to a step increase in glucose concentration were sharply (50%–60%) reduced by Rfx6 deletion (Figures 5A and 5D). A smaller (~20%) reduction was also apparent in the overall number of

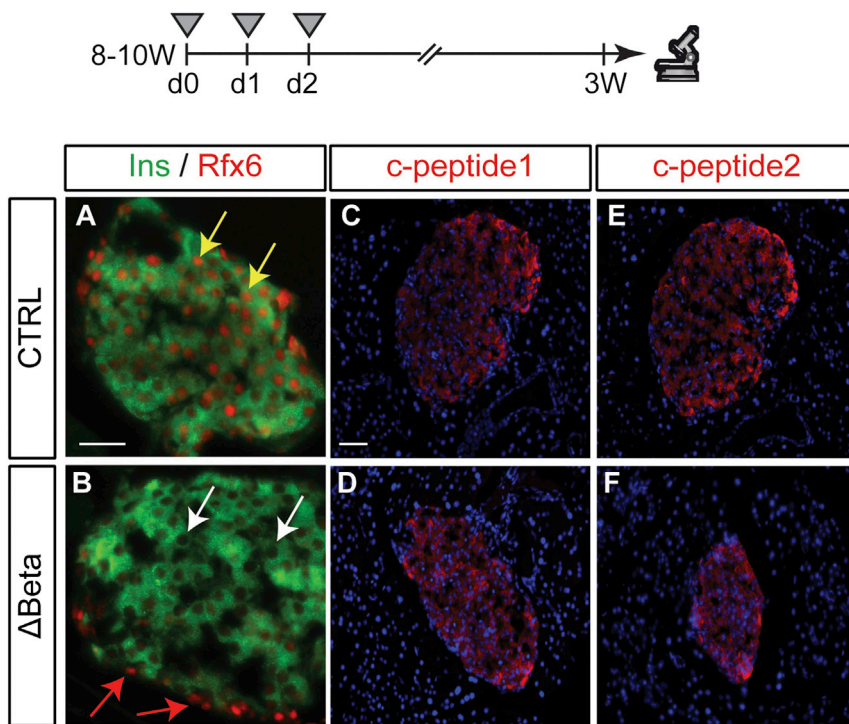

**Figure 2. Insulin Is Produced in Adult  $\beta$  Cells Lacking Rfx6**

(A–F) Immunofluorescence staining on controls and Rfx6 $\Delta$ Beta (Rfx6<sup>fl/fl</sup>; Ins1-CreERT<sup>2</sup>) adult mice, 3 weeks after the first day of tamoxifen injections (8- to 10-week-old mice were injected once a day during 3 consecutive days). Staining for insulin (green, A and B) and Rfx6 (red, A and B) reveal insulin expression despite efficient deletion of Rfx6 in  $\beta$  cells of Rfx6 $\Delta$ Beta mice (white arrows in B). Staining for c-peptide1 (red, C and D) and c-peptide2 (red, E and F) supports efficient insulin synthesis.

(G–L) qRT-PCR experiments on islets purified from controls and Rfx6 $\Delta$ Beta adult (8- to 10-week-old) mice 5 days after tamoxifen injections revealing rapid and specific deletion of *Rfx6* (G) in  $\beta$  cells and decreased *Ins1* transcription (H), while the expression of *Gcg*, *Ppy*, *Sst* and *ChgA* is unaltered. Grey triangles indicate the days of tamoxifen injections. Yellow and red arrows point to examples of  $\beta$  cells expressing Rfx6 in controls and insulin-negative/Rfx6-positive cells in Rfx6 $\Delta$ Beta mice, respectively.

Scale bars, 50  $\mu$ M. Data are presented as mean  $\pm$  SD on n = 4 samples; \*\*\*p < 0.001, \*\*p < 0.01, \*p < 0.05.

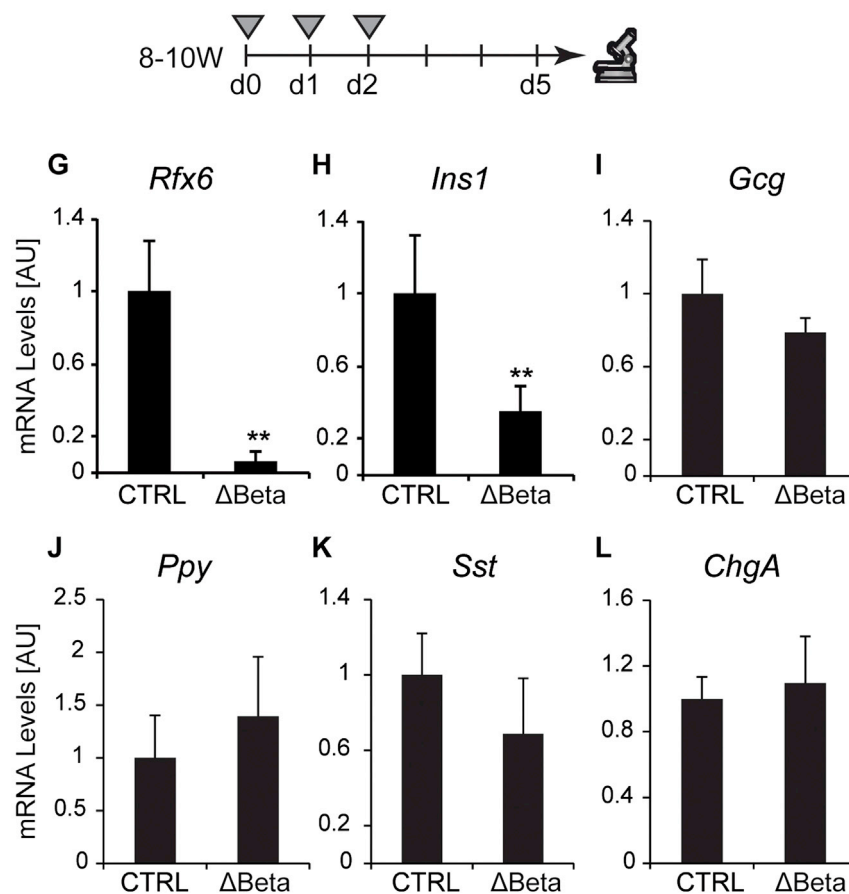

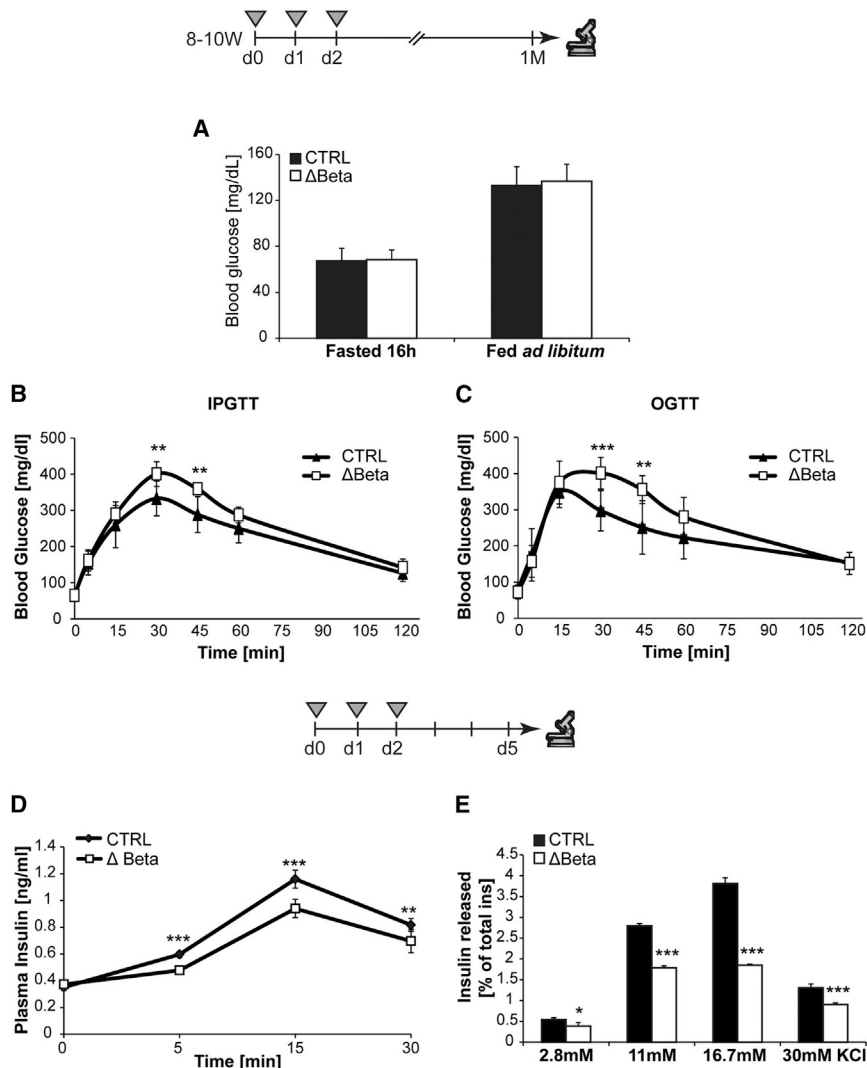

**Figure 3. The Deletion of *Rfx6* in  $\beta$  Cells Causes Glucose Intolerance due to Defective Insulin Secretion**

(A–C) Exploration of glucose metabolism in adult (12- to 14-week-old) controls ( $n = 8$ ) and  $Rfx6^{\Delta\beta}$  ( $n = 7$ ) males under normal diet 4 weeks after tamoxifen injections. Blood glucose levels are measured in overnight (16 hr)-fasted and ad libitum-fed animals 1 month after tamoxifen injections (A). Intraperitoneal glucose tolerance test (IPGTT) after 16 hr fasting in male mice 1 month after tamoxifen injections (B). Oral glucose tolerance test (OGTT) after 16 hr fasting in male mice 1 month after tamoxifen injections (C). (D) Histogram representing the plasma insulin levels of control and  $Rfx6^{\Delta\beta}$  mice (9–11 weeks old) during an in vivo glucose-stimulated insulin secretion test ( $n = 6$ ) performed 5 days after tamoxifen injections. (E) Histogram representing the insulin released during an ex vivo glucose- and KCl-stimulated insulin secretion tests on islets purified from controls and  $Rfx6^{\Delta\beta}$  ( $n = 4$ ) mice (9–11 weeks old), 5 days after tamoxifen injections. Data are presented as mean  $\pm$  SD; \* $p < 0.05$ , \*\* $p < 0.01$ , \*\*\* $p < 0.001$ .

VDCC genes, at X-boxes in intron 1 of *Cacna1c* and *Cacnb2* genes, respectively (Figures 5K and 5L), suggesting that *Rfx6* can directly regulate these genes, a result confirmed by quantitative ChIP (Figures 6M–6O). Collectively, these data suggest that compromised insulin secretion in *Rfx6*-deficient  $\beta$  cells is the consequence, at least in large part, of the combined alteration of key steps in glucose signaling due to a failure of *Rfx6* to directly promote the expression of key genes. These include both glycolysis,

impaired by downregulation of *Gck*, and  $Ca^{2+}$  influx, affected by the repression of voltage-gated calcium channels.

### Derepression of the Disallowed Genes in $\beta$ Cells Lacking *Rfx6*

We next sought to determine whether additional mechanisms may also play a role in defective glucose-induced insulin secretion in *Rfx6* null  $\beta$  cells. *Rfx* transcription factors have been reported to be either activators or repressors of transcription (Aftab et al., 2008). Accordingly, RNA-seq revealed a series of genes with a higher expression in  $\beta$  cells after *Rfx6* deletion. Surprisingly, we found a specific upregulation of the so-called disallowed or forbidden genes. Disallowed genes are genes that are abundantly expressed in most tissues but selectively repressed in adult mouse  $\beta$  cells. Two different studies identified a total of 68 of these genes by microarray analysis (Pullen et al., 2010; Thorrez et al., 2011). We found that 54 out of the 68 disallowed genes reported were upregulated in  $Rfx6^{\Delta\beta}$  islets, including the 11 common genes identified in both studies (Pullen

responsive cells (Figure 5B). These changes were accompanied by more modest, but significant, defects in the response to depolarization with KCl (Figures 5C and 5E), suggesting a defect downstream of metabolic signal generation by glucose. Defects in the latter process were, nonetheless, highlighted by a substantial (~60%) impairment in glucose-induced cytosolic ATP/ADP increases (Hodson et al., 2014b; Tarasov et al., 2012) (Figures 5F and 5G), consistent with lowered *Gck* expression.

In line with the above defects in calcium influx, RNA sequencing (RNA-seq) performed on  $Rfx6^{\Delta\beta}$  and control whole islets, 5 days after tamoxifen treatment, revealed that the expression of eight voltage-dependent calcium channels (VDCCs) transcripts was downregulated by the deletion of *Rfx6* in adult  $\beta$  cells (Table S2). These genes included *Cacna1a*, *Cacnb2*, *Cacna1d*, and *Cacna1c*, which are among the most abundantly expressed VDCCs in rodent islets (Table S2). Downregulation of *Cacna1d*, *Cacna1c*, and *Cacnb2* was confirmed by RT-PCR (Figures 5H–5J). ChIP sequencing (ChIP-seq) in Min6B1 cells revealed that *Rfx6* binds to two of the *Rfx6*-dependent

and Rutter, 2013), namely *Slc16a1*, *Ldha*, *Pdgfra*, *Igfbp4*, *Cxcl12*, *Oat*, *Smad3*, *Lmo4*, *C1qbp*, *Maf*, and *Cd302* (Table S3). We confirmed the upregulation of some of the selected genes by qRT-PCR: *Ldha*, *Slc16a1*, *Pdgfra*, and *Igfbp4* (Figures 6A–6D). ChIP-seq and quantitative ChIP in Min6B1 cells revealed that Rfx6 binds to a conserved region approximately 10 kb upstream of *Ldha* gene (Figures 6E and 6F), suggesting that Rfx6 could directly regulate the repression of this gene in  $\beta$  cells. Some of the disallowed genes have been reported to modulate insulin secretion (see Discussion and Pullen and Rutter, 2013). Thus, by repressing the disallowed genes, Rfx6 contributes to the maintenance of  $\beta$  cell identity and function.

## DISCUSSION

Previous studies have revealed that Rfx6 is required during development in rodents and in humans for the generation of  $\beta$  cells (Smith et al., 2010). The present work now demonstrates that this factor is also essential for the maintenance of the functional identity of the adult  $\beta$  cell.

### Rfx6 and Insulin Production

To determine the role of Rfx6 in  $\beta$  cell function, we conditionally and specifically inactivated this factor in mature adult  $\beta$  cells. The resulting Rfx6 <sup>$\Delta$ Beta</sup> mice are glucose intolerant in contrast to the phenotype of the *Rfx6* null mice, which die shortly after birth with severe and sustained hyperglycemia (>600 mg/dl). This difference indicates that Rfx6 has a distinct function in adult  $\beta$  cells that is different from its earlier function in the embryonic pancreas. In the embryo, our data in Rfx6 <sup>$\Delta$ Endo</sup> mouse pancreas clearly show that Rfx6 is required downstream of Ngn3 for proper  $\beta$  cell development, when cells are already committed to an islet fate. It is unclear whether the strongly impaired expression of insulin transcripts and peptide in the Rfx6 <sup>$\Delta$ Endo</sup> embryonic pancreas reflects a blockade in the  $\beta$  cell differentiation program or a direct regulation of the transcription of *Insulin* genes by Rfx6. However, it is likely that Rfx6 has a very early function downstream of Ngn3 and implements genetic programs essential for islet subtype specification to proceed. This hypothesis is supported by the up- and downregulation of *Pax4* and *Arx*, respectively (also observed in the constitutive Rfx6 knockout; our own data and Smith et al., 2010), known to control  $\beta$ - $\delta$  versus  $\alpha$  destiny (Collombat et al., 2003). One possibility would be that in a wild-type situation, Rfx6 would favor the  $\alpha$  destiny by promoting *Arx* expression and simultaneously blocking the  $\beta$  fate by repressing *Pax4*. However, Rfx6 must have an additional role; otherwise, we would have observed an increased number of  $\beta$  cells in Rfx6 <sup>$\Delta$ Endo</sup> embryos, which is not the case. The maintenance of generic markers of endocrine differentiation such as chromogranin A testifies that endocrine differentiation proceeds in the absence of Rfx6. On the other hand, the strong downregulation of *Ins1*, *Ins2*, *Gcg*, *Ghr*, and *Sst* mRNAs suggests that Rfx6 implements a genetic program required for hormone production in embryonic islet cells. In adult mice, the overall production of insulin is not altered in Rfx6 <sup>$\Delta$ Beta</sup> islets and thus Rfx6 is not indispensable for insulin production in  $\beta$  cells. However, *Ins1* transcripts are decreased when *Rfx6* is deleted in  $\beta$  cells, while *Ins2* transcripts do not vary. A similar result has been reported in mice

lacking *NeuroD1* in  $\beta$  cells (Gu et al., 2010), although *Ins1* was reduced by 95% in this model, in contrast to 65% in Rfx6 <sup>$\Delta$ Beta</sup> islets. ChIP-seq and quantitative ChIP in Min6B1 cells did not reveal any binding of Rfx6 to putative X-boxes, suggesting that Rfx6 does not directly regulate *Ins1* gene, although we cannot exclude that it is the case in bona fide  $\beta$  cells. Furthermore, like in mice lacking *NeuroD1* in  $\beta$  cells, the expression of other regulators of *Insulin* transcription such as *MafA*, *Nkx6.1*, and *Pdx1* is unchanged in Rfx6 <sup>$\Delta$ Beta</sup> islets, suggesting that the reduction in *Ins1* transcripts results from decreased levels of *NeuroD1*. Decreased *Ins1* transcript levels could also result from low *Pax6*, which is necessary for insulin synthesis in adult  $\beta$  cells (Hart et al., 2013). Importantly, we observed a downregulation, and not a complete loss, of *NeuroD1* and *Pax6* and suspect that levels of these transcription factors are sufficient to account for the insulin mRNA levels measured in Rfx6 <sup>$\Delta$ Beta</sup> islets. However, we did not observe any signal reduction in anti-insulin immunofluorescence experiments, and total insulin content was not affected either, probably because the reduction of *Ins1* mRNA was less severe compared to mice lacking *NeuroD1* in  $\beta$  cells. Such a decrease in *Ins1* transcripts without any significant effect on insulin content has been described previously, such as in *MafA*-deficient mice (Zhang et al., 2005), and may reflect alterations in mRNA translation.

### Rfx6 and Insulin Secretion

We found that without the transcription factor Rfx6, insulin secretion is impaired in  $\beta$  cells and mice become glucose intolerant. Defective insulin secretion resulted from a combined effect to reduce expression of three core components of the glucose-stimulated signaling pathway in  $\beta$  cells, which we show to be direct targets of Rfx6. First, mRNAs encoding the glucose sensor Glucokinase were decreased (~75%) in Rfx6 <sup>$\Delta$ Beta</sup> islets. Glucokinase is the flux-generating enzyme of oxidative glycolysis, coupling blood glucose concentration to metabolic signals in  $\beta$  cells, ultimately leading to rises in cytosolic ATP/ADP ratios triggering the closure of K<sub>ATP</sub> channels and subsequent membrane depolarization. Gene-deletion experiments in mice have demonstrated that *Gck* is essential for insulin secretion and maintenance of glucose homeostasis and that reduction in *Gck* gene dosage (*Gck*<sup>+/-</sup> mice) is sufficient to induce mild hyperglycemia (Terauchi et al., 1995). We thus believe that decreased *Gck* levels are the principal cause of the failure of the cytosolic ATP/ADP ratio to increase appropriately upon glucose stimuli in Rfx6 <sup>$\Delta$ Beta</sup> islets. Interestingly, insulin secretion reaches a plateau at 11 mM glucose in Rfx6 <sup>$\Delta$ Beta</sup> islets, and further increases in glucose concentrations have no effect on insulin secretion, demonstrating that the response to glucose is saturated. Though other steps in the pathway may also be affected, this change in glucose dose response is consistent with a shift in the control of glycolytic flux toward other hexokinase family members (HKI-III) with lower Michaelis constants for the sugar. Second, we found that *Abcc8/SUR1* transcripts encoding the regulatory subunit of the ATP-sensitive K<sup>+</sup> channel (K<sub>ATP</sub> channels) are downregulated as well in Rfx6 <sup>$\Delta$ Beta</sup> islets. Thus, we propose that lowered *Abcc8*, which would tend to raise the resting plasma membrane potential at low glucose while impairing stimulation by the sugar (Nenquin et al., 2004), combined with suboptimal increases in



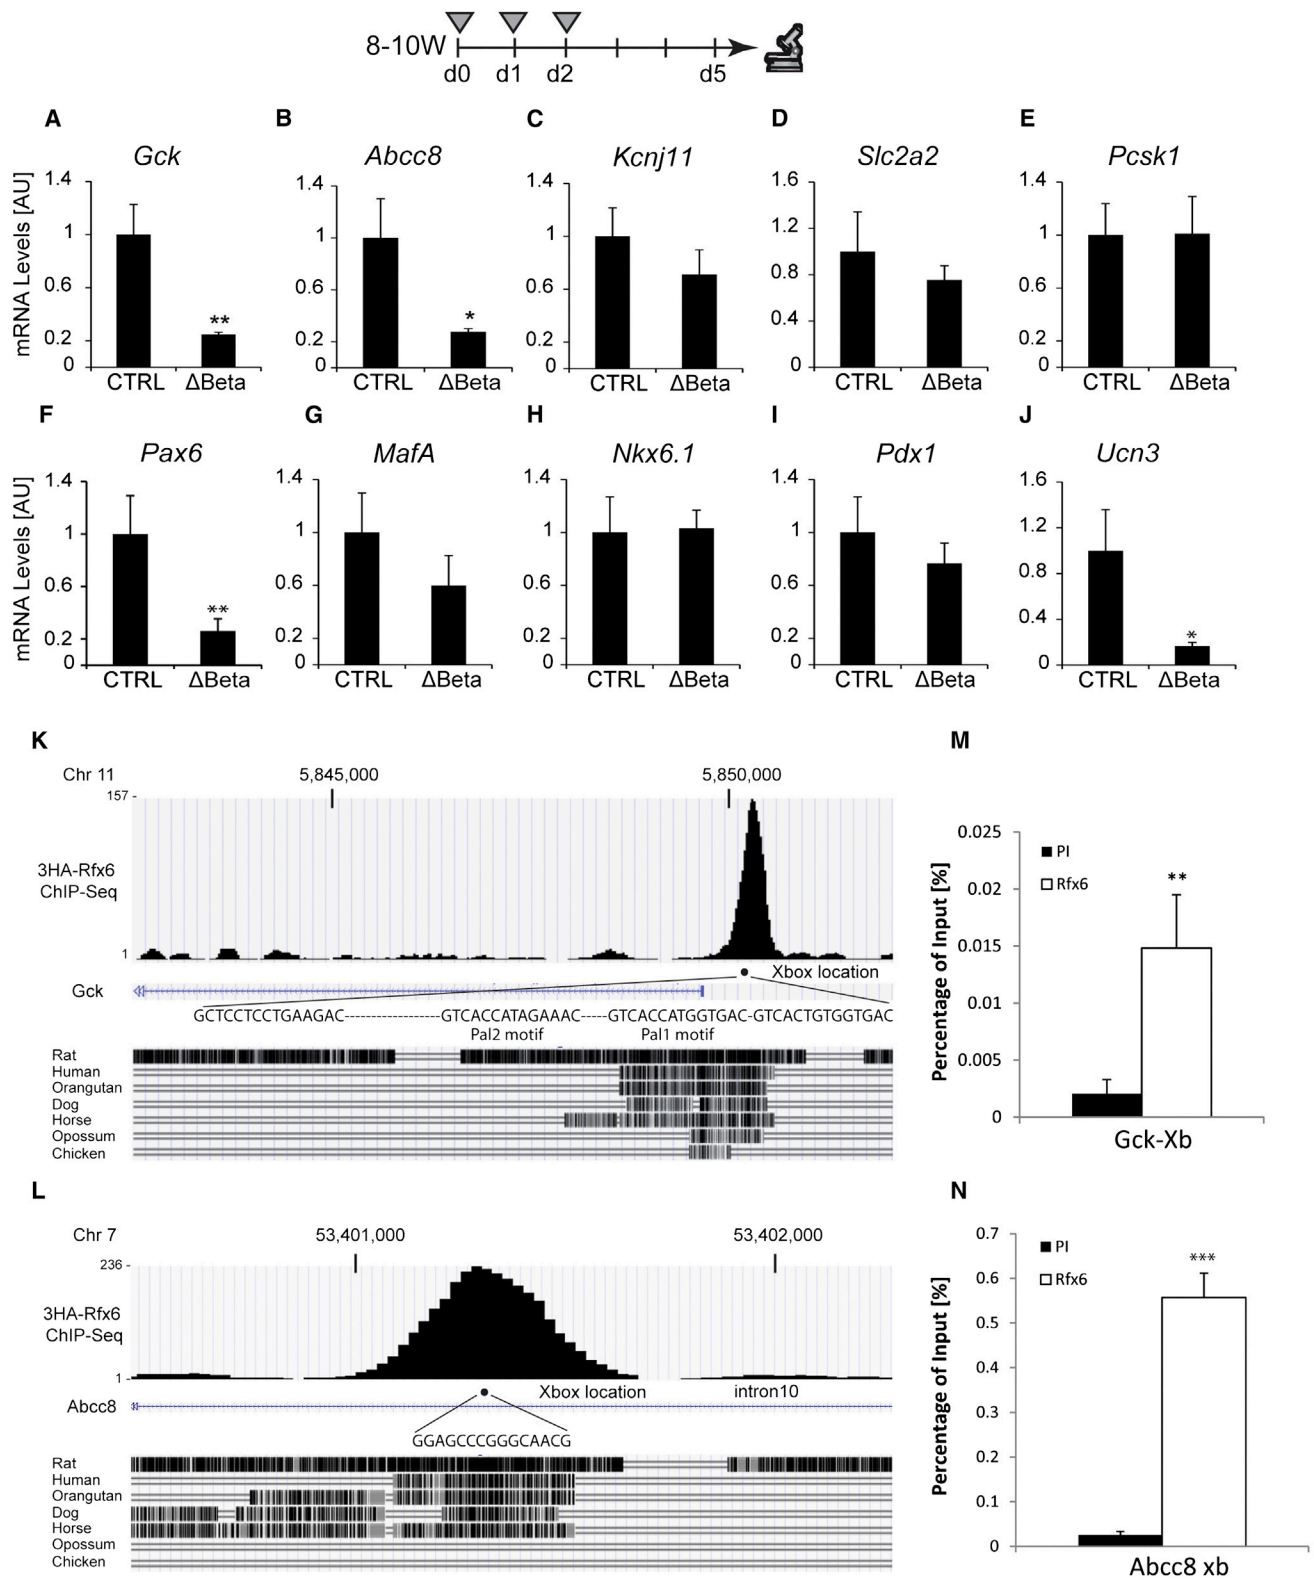

**Figure 4. Rfx6 Regulates a Subset of Genes Controlling  $\beta$  Cell Function and Directly Targets *Gck* and *Abcc8***  
(A–J) qRT-PCR experiments for *Gck*, *Kcnj11*, *Abcc8*, *Slc2a2*, *Pcsk1*, *Pax6*, *MafA*, *Nkx6.1*, *Pdx1*, and *Ucn3* on islets purified from controls and Rfx6 <sup>$\Delta$ Beta</sup> adult mice (9–11 weeks old), 5 days after tamoxifen injections. Grey triangles indicate the days of tamoxifen injections.

(legend continued on next page)

ATP/ADP ratios, alters  $\beta$  cell membrane excitability. This, in turn, will affect the opening of voltage-dependent  $\text{Ca}^{2+}$  channels, at least partially explaining impaired glucose-induced  $\text{Ca}^{2+}$  influx. Third, we found that Rfx6 is also critical for the expression of several voltage-dependent calcium channels mRNAs of the L, R, and P/Q type, which are downregulated in Rfx6 $^{\Delta\text{Beta}}$  islets. These include central players such as the L-type  $\text{Ca}^{2+}$  channel subunit alpha 1C (*Cacna1c*, also named as *Ca<sub>v</sub>1.2*) and the R-type  $\text{Ca}^{2+}$  channel alpha 1E (*Cacna1e*, also named *Cav2.3*) subunits, which have been shown to be essential for insulin secretion in mice by regulating first and second phases of secretion, respectively (Jing et al., 2005; Schulla et al., 2003). Thus, in addition to decreased glycolysis and reduced levels of  $\text{K}_{\text{ATP}}$  channel Abcc8/SUR1 subunits, lowered voltage-gated  $\text{Ca}^{2+}$  channels likely contributes to the impaired elevation of intracellular  $\text{Ca}^{2+}$  and accounts for defective KCl-stimulated insulin secretion. Finally, we noted that the zinc transporter *Slc30a8* (*ZnT8*), required for normal insulin crystallization and secretion (Rutter, 2010), was also repressed after Rfx6 deletion (Table S1), suggesting that later events in the exocytotic process may also be affected. Nevertheless, and despite multiple deficiencies in several steps controlling glucose-induced secretion, Rfx6 $^{\Delta\text{Beta}}$  are only mildly glucose intolerant. As we did not reveal any increase in  $\beta$  cell mass, we suggest that Rfx6 $^{\Delta\text{Beta}}$  mice compensate their impaired insulin secretion by other mechanisms, which may include an increased insulin sensitivity or higher secretion of glucocorticoids.

Importantly, ChIP experiments in the mouse  $\beta$  cell line Min6B1 suggest that Rfx6 binds to X-boxes in *Gck*, *Abcc8*, and the VDCC *Cacna1c* and *Cacnb2* genes. These results, together with the expression data of Rfx6 $^{\Delta\text{Beta}}$  islets (RNA-seq), clearly suggest that Rfx6 controls  $\beta$  cell function in the adult by directly regulating the expression of key core components of the insulin-secretion pathway. Interestingly, *Gck* has been previously reported to be a direct target of Rfx3 (Ait-Lounis et al., 2010). The fact that we independently found, by an unbiased method (ChIP-seq), that Rfx6 binds to the very same region in the *Gck* promoter as Rfx3 strongly supports that Rfx transcription factors are important regulators of *Gck* expression. However, Rfx3 (*Rfx3* expression is unaffected in Rfx6 $^{\Delta\text{Beta}}$  islets) was not sufficient to compensate for the absence of Rfx6, regarding *Gck* expression, suggesting that Rfx3-Rfx6 heterodimers bind to the *Gck* promoter for the optimal transcription of *Gck* gene. Binding of Rfx3 to *Abcc8* or voltage-dependent  $\text{Ca}^{2+}$  channel genes has not been reported, and although Rfx6 and Rfx3 might coregulate other targets genes, the extent of the functional redundancy of both transcription factors in  $\beta$  cell function and insulin secretion cannot be evaluated, as the phenotype of mice with a deletion of *Rfx3* in adult  $\beta$  cells has not been described. Likewise, whether a small but significant ( $\sim 30\%$ ) decrease in *Rfx5* expression (Table S1) observed here also contributes to the phenotype of Rfx6 null adult mice remains a question for the future.

### Rfx6 Contributes to the Silencing of the Disallowed Genes and Maintenance of $\beta$ Cell Maturity

A group of disallowed or “forbidden” housekeeping genes has recently been described to be selectively repressed in  $\beta$  cells. The potential role of their repression in  $\beta$  cell function and glucose homeostasis (discussed in detail in Pullen and Rutter, 2013) is still to be fully elucidated. However, it has been proposed for the two founder members, lactate dehydrogenase A (*Ldha*) and monocarboxylate transporter-1 (*MCT-1/Slc16a1*), that their downregulation in  $\beta$  cells prevents lactate and pyruvate, produced from muscle during exercise, from inappropriately stimulating insulin release (Thorrez et al., 2011). At present, it is unclear whether a general mechanism controls the silencing of all (or most) of the disallowed genes. However, epigenetic mechanisms such as the trimethylation of histone H3 on lysine 27 (H3K27me3) has been suggested to be the cause of disallowed gene repression, as H3K27me3 was found present on *Slc16a1* promoter (van Arensbergen et al., 2010) and a few other forbidden genes (*Cxcl12*, *Acot7*, *Nfib*, *Mgst1*, and *Maf*) (Pullen and Rutter, 2013). Likewise, DNA methylation is reported also to be involved in the repression of some (e.g., *Acot7*) (Dayeh et al., 2014), but not other (*Slc16a1/MCT1*) (Pullen et al., 2011), members of this family. On the other hand, microRNAs have also been reported to downregulate *Slc16a1* (Pullen et al., 2011). Our current study provides evidence of another mechanism whereby a transcription factor (Rfx6) may act as a master regulator, repressing disallowed genes and serving as a common mechanism for disallowed gene downregulation, as we found that  $\sim 79\%$  of these genes were significantly upregulated in Rfx6 $^{\Delta\text{Beta}}$  islets. We found that Rfx6 binds to an X-box located  $\sim 10$  kb upstream of *Ldha* start site in Min6B1 cells, supporting direct repression. Along the same lines, and further supporting the notion that Rfx6 directly targets disallowed genes, we identified Rfx6 binding peaks in the vicinity of 32 out of 54 (59%) Rfx6-repressed disallowed genes (Table S3). Of note, increased expression of *Ldha* has also been described when *NeuroD1* is deleted in  $\beta$  cells (Gu et al., 2010). We thus cannot exclude that the repression of *NeuroD1*, observed in Rfx6 $^{\Delta\text{Beta}}$  islets, also contributes to elevated *Ldha* transcript levels, a feature of neonatal  $\beta$  cells, in contrast to mature  $\beta$  cells, which have low amounts of *Ldha* (Gu et al., 2010; Sekine et al., 1994). Importantly, other members of the disallowed family have not been reported to be dysregulated in *NeuroD1*-deficient  $\beta$  cells. Taken together, our own and others’ data suggest that repression of disallowed genes is achieved by multiple mechanisms including transcription factor-mediated repression of gene expression. Tissue-specific gene repression is thought to proceed during the maturation of islet cells during postnatal stages (Thorrez et al., 2011), a period when  $\beta$  cells acquire a mature GSIS (Blum et al., 2012). Interestingly, we did not observe any change in the expression of disallowed genes in the embryonic pancreas of Rfx6-deficient mice (data not shown). Thus, we propose that

(K and L) ChIP-seq (anti-HA) data showing Rfx6 binding peaks in *Abcc8* and *Gck* genes in 3HA-Rfx6 transfected Min6B1 cells.

(M and N) Quantitative ChIP (anti-Rfx6 antibody) in Min6B1 cells illustrating the binding of Rfx6 to X-boxes indicated in (K) and (L). PI and Rfx6 stand for preimmune and anti-Rfx6 serum.

Data are presented as mean  $\pm$  SD on  $n = 4$ –5 samples; \*\* $p < 0.01$ , \* $p < 0.05$ .

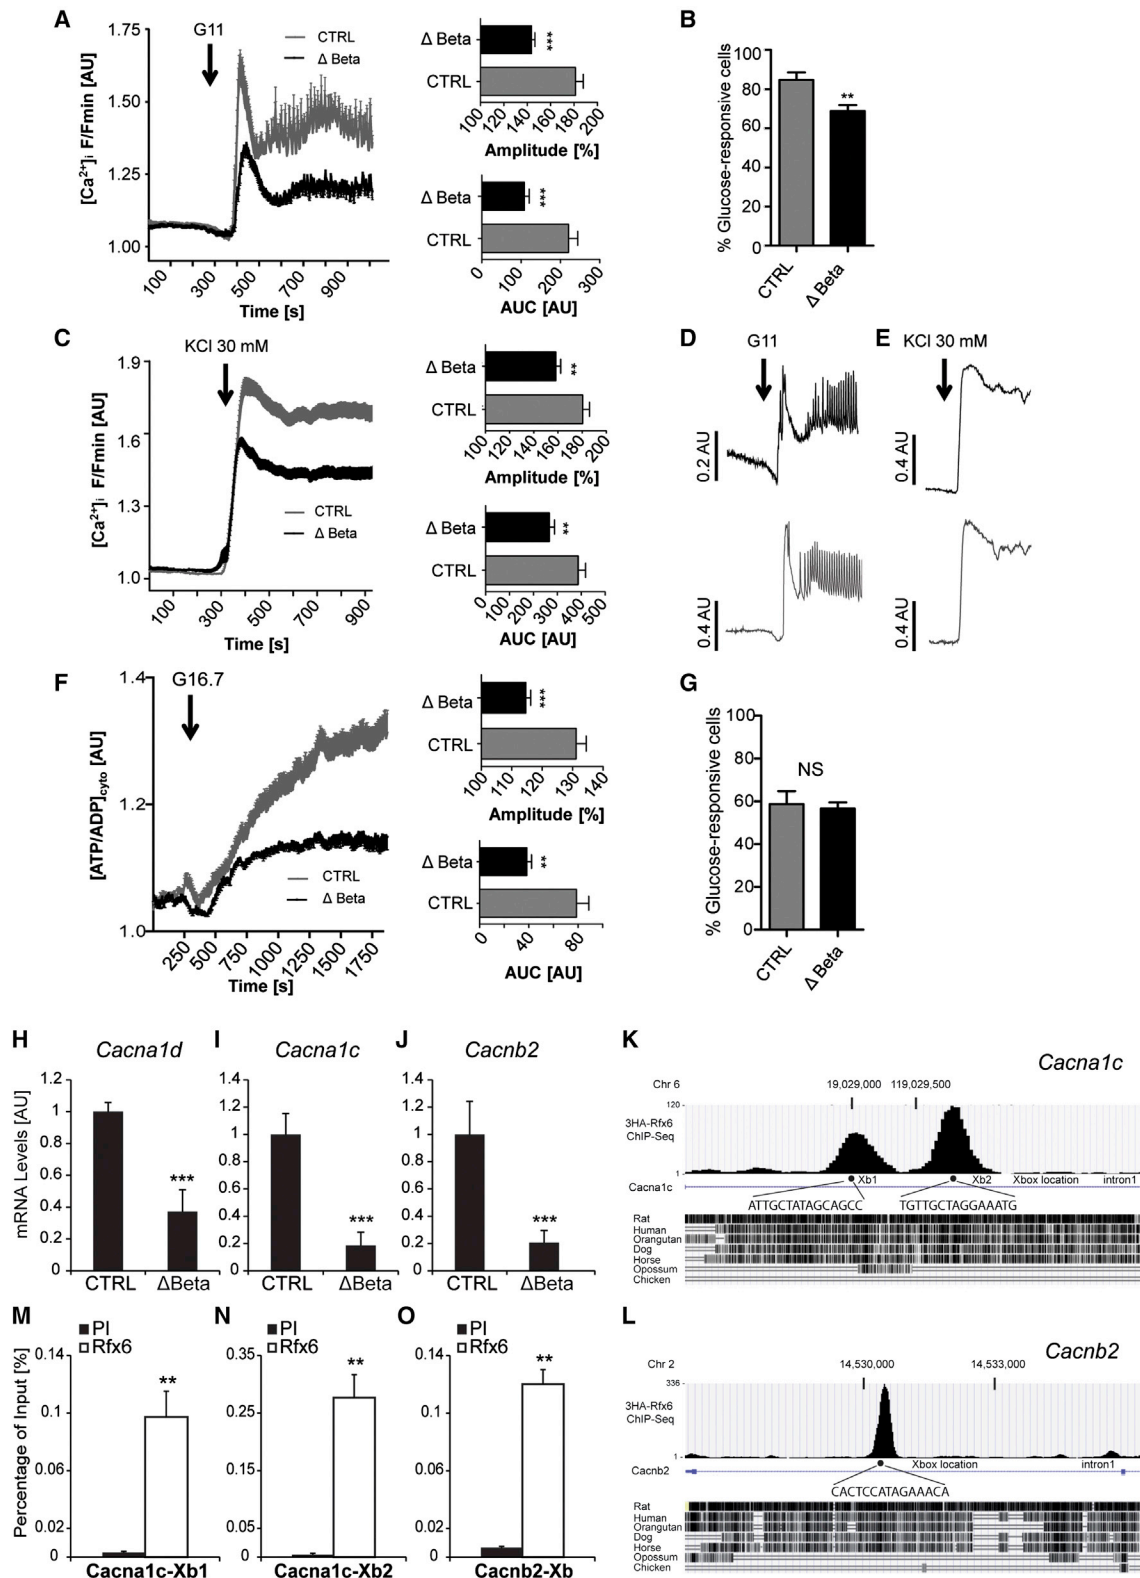

**Figure 5. Impaired ATP/ADP Ratio and Calcium Trafficking in Glucose Stimulated  $\beta$  Cells in *Rfx6* <sup>$\Delta$ Beta</sup> Islets**

(A) Mean ( $\pm$ SEM)  $Ca^{2+}$  traces following elevation of glucose from 3 mM to 11 mM (n = 16 islets from five mutants and six controls). Insets are the amplitude and area under the curves.

(legend continued on next page)

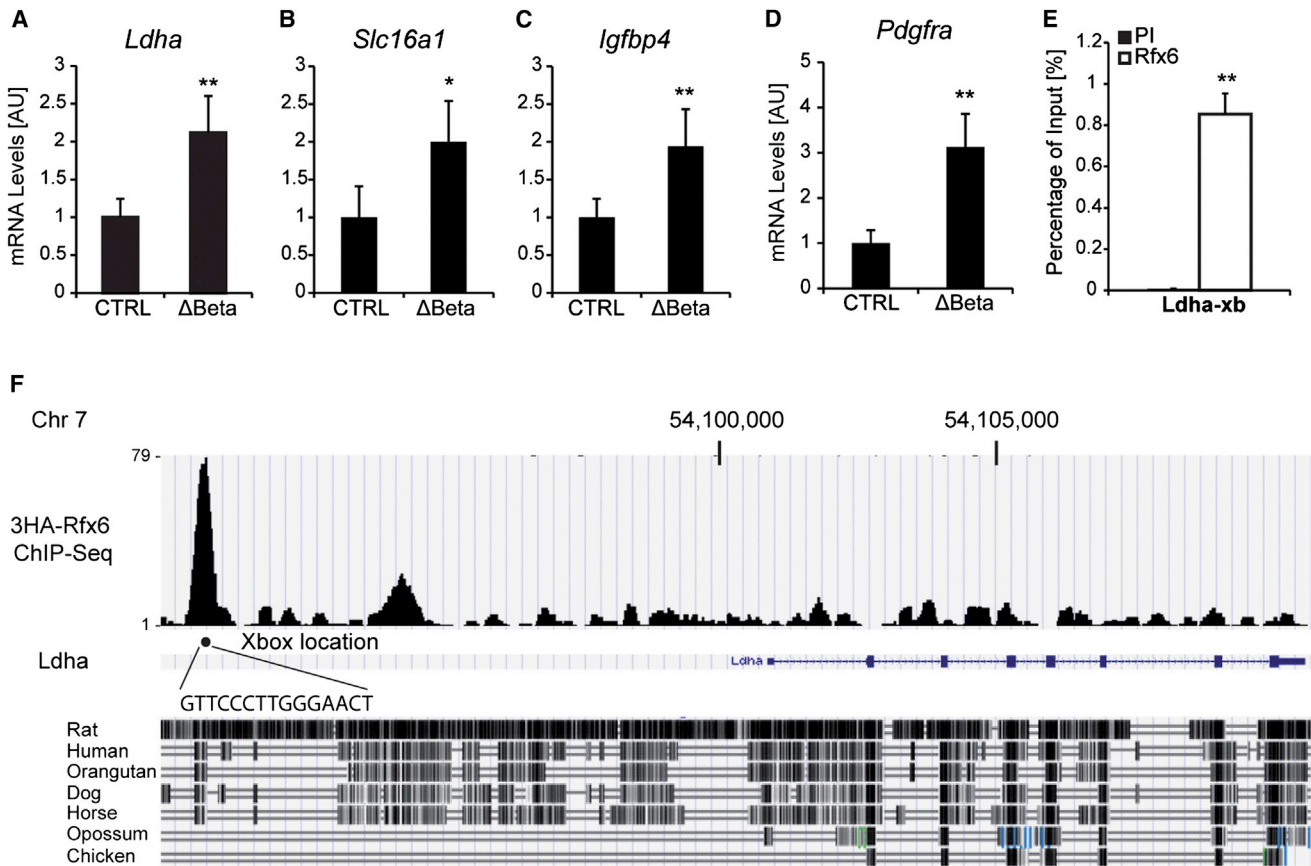

**Figure 6. Rfx6 Targets and Represses Disallowed Genes in  $\beta$  Cells**

(A–D) qRT-PCR showing the downregulation of *Ldha*, *Slc16a1*, *Igfbp4*, and *Pdgfra* in islet cells from Rfx6 $\Delta$ Beta mice (9–11 weeks old), 5 days after tamoxifen injections compared to controls (n = 4).

(E and F) ChIP-PCR and ChIP-seq revealing the binding of Rfx6 on one X-box in *Ldha* gene in Min6B1 cells (n = 3).

Data are presented as mean  $\pm$  SD; \*\*p < 0.01, \*p < 0.05.

Rfx6 is essential to establish and maintain the repression of the disallowed genes and thereby the maturity of  $\beta$  cells. The extent to which perturbation of disallowed gene expression contributes to the phenotype of Rfx6 $\Delta$ Beta mice remains to be studied. However, it was shown previously that overexpression of *Ldha* diminishes glucose-stimulated insulin secretion in islets (Ainscow et al., 2000; Ishihara et al., 1999). Moreover, forced overexpression of *Slc16a1* in  $\beta$  cells leads to insulin secretion in response to muscle-derived pyruvate (Pullen et al., 2012) and is thought to be responsible for exercise-induced hyperinsulin-

ism in humans (Otonkoski et al., 2007). In addition to *Ldha* and *Slc16a1*, several other disallowed genes potentially impact insulin secretion and glucose homeostasis, acting as second messengers controlling insulin secretion or regulating trafficking of insulin granules (see Pullen and Rutter, 2013 for a review). Thus, Rfx6 controls  $\beta$  cell maturity and glucose homeostasis by repression of the disallowed genes and activation of core component of the insulin secretion pathway, including glucokinase, the Abcc8/SUR1 subunit of  $K_{ATP}$  channels and voltage-gated  $Ca^{2+}$  channels.

(B) Proportion of fluo2-loaded cells that respond to 11 mM glucose.

(C) Mean ( $\pm$ SEM)  $Ca^{2+}$  traces following application of the depolarizing stimulus 30 mM KCl (n = 18 islets from same animals as A).

(D) Representative  $Ca^{2+}$  responses to 11mM glucose in a single islet (average of about 50 responsive cells per islet).

(E) Representative  $Ca^{2+}$  responses to 30 mM KCl in a single islet.

(F) Mean ( $\pm$ SEM) Perceval traces recording ATP dynamics following elevation of glucose from 3 mM to 16.7 mM (~250 cells from n = 12 islets from four mutants and four controls). Insets are the amplitude and area under the curves of cytosolic ATP/ADP rises ( $[ATP/ADP]_{cyto}$ ).

(G) Proportion of Perceval-expressing cells, shown to represent beta cells (Hodson et al., 2014a) that respond to 16.7 mM glucose.

(H–J) qRT-PCR revealing the decrease in the transcription of *VDCCs* in Rfx6 $\Delta$ Beta islets (n = 4).

(K–O) ChIP-seq (K and L) and quantitative ChIP (M–O) showing the binding of Rfx6 on X-boxes of *Cacna1c* and *Cacnb2* genes in Min6B1 cells (n = 3). PI and Rfx6 in (M) and (N) stand for preimmune and anti-Rfx6 serum.

Data are presented as mean  $\pm$  SD; \*\*\*p < 0.001, \*\*p < 0.01.



We show here that Rfx6 is required for normal  $\beta$  cell identity, sustaining the expression of signature  $\beta$  cell genes (*Gck*, *Abcc8*) and repressing that of disallowed genes. These findings raise the possibility that changes in RFX6 expression may contribute to  $\beta$  cell failure in type 2 diabetes (T2D) in humans. To date, however, no such changes in *RFX6* mRNA have been reported in T2D versus healthy donor  $\beta$  cells (Marselli et al., 2010; Taneera et al., 2012), despite the increased expression of 15 disallowed genes in human T2D (Pullen and Rutter, 2013). However, we would point out that these studies involved a relatively small number of subjects, and therefore, we need to wait for the results of much larger ongoing trials to conclude whether subtle changes in *RFX6* levels are associated with T2D. Furthermore, changes in *RFX6* activity resulting from altered subcellular localization or posttranslational modifications cannot be excluded in diseased islets. Interestingly, fasting hyperglycemia has been reported in a patient bearing a heterozygote mutation in the *RFX6* gene and SNP susceptibility to T2D, supporting a role for RFX6 in  $\beta$  cell function in humans (Artuso et al., 2014).

Finally these results suggest that, in addition to having fewer  $\beta$  cells, sufferers of neonatal diabetes who carry *RFX6* mutations are also likely to have defects in those cells that remain (Mitchell et al., 2004). Whether these individuals may therefore be susceptible to pharmacological treatments, including sulphonylureas or GLP-1 analogs, which could prompt insulin release from the remaining  $\beta$  cells, may be worthy of investigation.

## EXPERIMENTAL PROCEDURES

### Immunostaining and Morphometric Analysis of Islets

Pancreata were fixed with 4% paraformaldehyde, cryo- or paraffin embedded, and stained with the primary and secondary antibodies listed in Supplemental Experimental Procedures. Antigen retrieval was used prior to staining for Rfx6. For bromodeoxyuridine (BrdU) detection assays, BrdU (50 mg/kg body weight) was injected 24 hr before sacrifice to assess proliferation in adult  $\beta$  cells. For  $\alpha$  and  $\beta$  cell mass, quantification was performed every 2 mm and calculated as described in Figure S3. Four animals of each genotype were analyzed. Animal experiments were supervised by G.G. (agreement N°C67-59 approved by the Direction des Services Vétérinaires, Strasbourg, France) in compliance with the European legislation on the care and use of laboratory animals.

### Insulin Secretion Assay

For each animal ( $n = 4$  per genotype, 8–10 weeks old), quadruplicates of five starved islets were placed in Eppendorf tubes containing 2 ml of Krebs' buffer containing 2.8 mM glucose, 11 mM glucose, 16.8 mM glucose, or 2.8 mM glucose + 30 mM KCl and incubated for 1 hr, and the supernatant was collected to measure insulin secretion. Quadruplicates of five unstimulated islets were sonicated and extracted by acid-ethanol. Insulin in supernatants and islet lysates was measured by ELISA (ultrasensitive insulin ELISA, ALPCO). Secreted insulin was then normalized with total lysate insulin content and expressed as a percentage of total insulin.

To measure insulin secretion in vivo, 9- to 11-week-old males were fasted for 16 hr, and we collected blood from animals ( $n = 6$  per genotype) before glucose injection and 5, 15, and 30 min after glucose injection. D-glucose solution (15%) was injected intraperitoneally at 3 g/kg body weight. Plasma was separated from blood by centrifugation, and circulating insulin was measured by ELISA (ultrasensitive insulin ELISA, ALPCO).

### RNA Sequencing

Total RNA was extracted from adult islets from three controls and three mutants, and RNA integrity was assessed. After sequencing (HiSeq 2500, 50

base reads), reads were mapped onto the mm9 assembly of the mouse genome by using Tophat v1.4.1 (Trapnell et al., 2009) and the bowtie v0.12.7 aligner (Langmead et al., 2009). Only uniquely aligned reads have been retained for further analyses.

### Calcium and ATP Imaging

Functional multicellular  $\text{Ca}^{2+}$ - and ATP/ADP-imaging were performed as previously described (Hodson et al., 2013; Hodson et al., 2014a, 2014b; Tarasov et al., 2012). Briefly, fluo2-loaded or Perceval-expressing islets were mounted in a custom-manufactured aluminum heated chamber and perfused with a HEPES-bicarbonate buffer (120 mM NaCl, 4.8 mM KCl, 24 mM  $\text{NaHCO}_3$ , 0.5 mM  $\text{Na}_2\text{HPO}_4$ , 5 mM HEPES, 3 mM D-glucose, 2.5 mM  $\text{CaCl}_2$ , and 1.2 mM  $\text{MgCl}_2$ ) saturated with 95%  $\text{O}_2$ /5%  $\text{CO}_2$  and adjusted to pH 7.4. During recording, islets were maintained at 36°C and drugs/glucose delivered through the perfusion system at the indicated concentrations. Excitation was performed using a 491 nm solid-state laser (Cobalt) coupled to a Yokogawa CSU10 Nipkow spinning disk head, and emitted signals were captured at 525  $\pm$  50 nm using a Hamamatsu 16-bit electron-multiplying charge-coupled device. An adenoviral vector was used to deliver cDNA encoding Perceval into the first few islet layers (multiplicity of infection, 10–100; 48 hr incubation).

### Statistics

Values are presented as mean  $\pm$  SD, and p values were determined using the two-tailed Student's t test with unequal variance.  $p < 0.05$  was accepted as statistically significant.

### ACCESSION NUMBERS

RNA-seq and ChIP-seq data have been deposited to the Gene Expression Omnibus under the accession numbers GSE59622 and GSE62844.

### SUPPLEMENTAL INFORMATION

Supplemental Information includes Supplemental Experimental Procedures, three figures, and three tables and can be found with this article online at <http://dx.doi.org/10.1016/j.celrep.2014.11.033>.

### AUTHOR CONTRIBUTIONS

J.P. designed the experiments, acquired and analyzed the data, and wrote the manuscript; P.S. performed the Rfx6 ChIP on Min6B1 cells; A.M. participated in the acquisition and analysis of the data; D.J.H. performed and analyzed the ex vivo calcium and ATP imaging experiments; T.Y. analyzed ChIP-seq data; C.K. analyzed RNA-seq data; M.C.B. generated and characterized Ins1-CreERT2 mice; and G.G. and G.A.R. designed the experiments, interpreted the data, and wrote the manuscript.

### ACKNOWLEDGMENTS

We are grateful to Dr. S. Yoshida for the Ngn3-Cre mice; the Mouse Clinical Institute for the Ins1-CreERT2 mice; Christelle Thibault, Bernard Jost, and Muriel Philipps of the Microarray and Deep Sequencing platform of the IGBMC; Dr. C. Wright for Pdx1 antibody; and the Beta Cell Biology Consortium for the c-peptide antibodies. This study was supported by the Institut National de la Santé et de la Recherche Médicale (INSERM) and by grants from the Agence Nationale pour la Recherche (ANR 11 BSV1 003-01 Rfx-Panclnt) and the Fondation pour la Recherche Médicale (FRM DEQ20110421295) to G.G. J.P. and P.S. are recipients of a fellowship from the Ministère de la Recherche and the Fondation ARC pour la recherche sur le Cancer. D.J.H. is a Diabetes UK R.D. Lawrence Fellow. G.A.R. thanks the MRC (UK) for Programme grant MR/J0003042/1, the BBSRC (UK) for a project grant (BB/J015873/1), the Royal Society for a Wolfson Research Merit Award, and the Wellcome Trust for a Senior Investigator Award (WT098424AIA).

Received: July 31, 2014  
 Revised: October 27, 2014  
 Accepted: November 20, 2014  
 Published: December 11, 2014

## REFERENCES

- Aftab, S., Semene, L., Chu, J.S., and Chen, N. (2008). Identification and characterization of novel human tissue-specific RFX transcription factors. *BMC Evol. Biol.* 8, 226.
- Ainscow, E.K., Zhao, C., and Rutter, G.A. (2000). Acute overexpression of lactate dehydrogenase-A perturbs beta-cell mitochondrial metabolism and insulin secretion. *Diabetes* 49, 1149–1155.
- Ait-Lounis, A., Bonal, C., Seguin-Estévez, Q., Schmid, C.D., Bucher, P., Herrera, P.L., Durand, B., Meda, P., and Reith, W. (2010). The transcription factor Rfx3 regulates beta-cell differentiation, function, and glucokinase expression. *Diabetes* 59, 1674–1685.
- Artuso, R., Provenzano, A., Mazzinghi, B., Giunti, L., Palazzo, V., Andreucci, E., Blasetti, A., Chiuri, R.M., Gianiorio, F.E., Mandich, P., et al. (2014). Therapeutic implications of novel mutations of the RFX6 gene associated with early-onset diabetes. *Pharmacogenomics J.*, Published online July 22, 2014 <http://dx.doi.org/10.1038/tpj.2014.37>.
- Blum, B., Hrvatin, S.S., Schuetz, C., Bonal, C., Reznia, A., and Melton, D.A. (2012). Functional beta-cell maturation is marked by an increased glucose threshold and by expression of urocortin 3. *Nat. Biotechnol.* 30, 261–264.
- Butler, A.E., Janson, J., Bonner-Weir, S., Ritzel, R., Rizza, R.A., and Butler, P.C. (2003). Beta-cell deficit and increased beta-cell apoptosis in humans with type 2 diabetes. *Diabetes* 52, 102–110.
- Collombat, P., Mansouri, A., Hecksher-Sorensen, J., Serup, P., Krull, J., Gradwohl, G., and Gruss, P. (2003). Opposing actions of Arx and Pax4 in endocrine pancreas development. *Genes Dev.* 17, 2591–2603.
- Concepcion, J.P., Reh, C.S., Daniels, M., Liu, X., Paz, V.P., Ye, H., Highland, H.M., Hanis, C.L., and Greeley, S.A. (2014). Neonatal diabetes, gallbladder agenesis, duodenal atresia, and intestinal malrotation caused by a novel homozygous mutation in RFX6. *Pediatr. Diabetes* 15, 67–72.
- Dayeh, T., Volkov, P., Saló, S., Hall, E., Nilsson, E., Olsson, A.H., Kirkpatrick, C.L., Wollheim, C.B., Eliasson, L., Rönn, T., et al. (2014). Genome-wide DNA methylation analysis of human pancreatic islets from type 2 diabetic and non-diabetic donors identifies candidate genes that influence insulin secretion. *PLoS Genet.* 10, e1004160.
- Gao, T., McKenna, B., Li, C., Reichert, M., Nguyen, J., Singh, T., Yang, C., Pannikar, A., Doliba, N., Zhang, T., et al. (2014). Pdx1 maintains  $\beta$  cell identity and function by repressing an  $\alpha$  cell program. *Cell Metab.* 19, 259–271.
- Gu, C., Stein, G.H., Pan, N., Goebbels, S., Hörnberg, H., Nave, K.A., Herrera, P., White, P., Kaestner, K.H., Sussel, L., and Lee, J.E. (2010). Pancreatic beta cells require NeuroD to achieve and maintain functional maturity. *Cell Metab.* 11, 298–310.
- Hart, A.W., Mella, S., Mendrychowski, J., van Heyningen, V., and Kleinjan, D.A. (2013). The developmental regulator Pax6 is essential for maintenance of islet cell function in the adult mouse pancreas. *PLoS ONE* 8, e54173.
- Hodson, D.J., Mitchell, R.K., Bellomo, E.A., Sun, G., Vinet, L., Meda, P., Li, D., Li, W.H., Bugliani, M., Marchetti, P., et al. (2013). Lipotoxicity disrupts incretin-regulated human  $\beta$  cell connectivity. *J. Clin. Invest.* 123, 4182–4194.
- Hodson, D.J., Mitchell, R.K., Marselli, L., Pullen, T.J., Gimeno Brias, S., Semplici, F., Everett, K.L., Cooper, D.M., Bugliani, M., Marchetti, P., et al. (2014a). ADCY5 couples glucose to insulin secretion in human islets. *Diabetes* 63, 3009–3021.
- Hodson, D.J., Tarasov, A.I., Gimeno Brias, S., Mitchell, R.K., Johnston, N.R., Haghollahi, S., Cane, M.C., Bugliani, M., Marchetti, P., Bosco, D., et al. (2014b). Incretin-modulated beta cell energetics in intact islets of Langerhans. *Mol. Endocrinol.* 28, 860–871.
- Ishihara, H., Wang, H., Drewes, L.R., and Wollheim, C.B. (1999). Overexpression of monocarboxylate transporter and lactate dehydrogenase alters insulin secretory responses to pyruvate and lactate in beta cells. *J. Clin. Invest.* 104, 1621–1629.
- lynedjian, P.B. (1993). Mammalian glucokinase and its gene. *Biochem. J.* 293, 1–13.
- Jing, X., Li, D.Q., Olofsson, C.S., Salehi, A., Surve, V.V., Caballero, J., Ivarsson, R., Lundquist, I., Pereverzev, A., Schneider, T., et al. (2005). Cav2.3 calcium channels control second-phase insulin release. *J. Clin. Invest.* 115, 146–154.
- Jonas, J.C., Sharma, A., Hasenkamp, W., Ilkova, H., Patanè, G., Laybutt, R., Bonner-Weir, S., and Weir, G.C. (1999). Chronic hyperglycemia triggers loss of pancreatic beta cell differentiation in an animal model of diabetes. *J. Biol. Chem.* 274, 14112–14121.
- Langmead, B., Trapnell, C., Pop, M., and Salzberg, S.L. (2009). Ultrafast and memory-efficient alignment of short DNA sequences to the human genome. *Genome Biol.* 10, R25.
- Li, C., Chen, P., Vaughan, J., Lee, K.-F., and Vale, W. (2007). Urocortin 3 regulates glucose-stimulated insulin secretion and energy homeostasis. *Proc. Natl. Acad. Sci. USA* 104, 4206–4211.
- Lilla, V., Webb, G., Rickenbach, K., Maturana, A., Steiner, D.F., Halban, P.A., and Irminger, J.C. (2003). Differential gene expression in well-regulated and dysregulated pancreatic beta-cell (MIN6) sublines. *Endocrinology* 144, 1368–1379.
- Marselli, L., Thorne, J., Dahiya, S., Sgroi, D.C., Sharma, A., Bonner-Weir, S., Marchetti, P., and Weir, G.C. (2010). Gene expression profiles of Beta-cell enriched tissue obtained by laser capture microdissection from subjects with type 2 diabetes. *PLoS ONE* 5, e11499.
- Marselli, L., Bugliani, M., Suleiman, M., Olimpico, F., Masini, M., Petrin, M., Boggi, U., Filippini, F., Syed, F., and Marchetti, P. (2013).  $\beta$ -Cell inflammation in human type 2 diabetes and the role of autophagy. *Diabetes Obes. Metab.* 15 (Suppl 3), 130–136.
- Matschinsky, F.M. (2005). Glucokinase, glucose homeostasis, and diabetes mellitus. *Curr. Diab. Rep.* 5, 171–176.
- McTaggart, J.S., Clark, R.H., and Ashcroft, F.M. (2010). The role of the KATP channel in glucose homeostasis in health and disease: more than meets the islet. *J. Physiol.* 588, 3201–3209.
- Mitchell, J., Punthakee, Z., Lo, B., Bernard, C., Chong, K., Newman, C., Cartier, L., Desilets, V., Cutz, E., Hansen, I.L., et al. (2004). Neonatal diabetes, with hypoplastic pancreas, intestinal atresia and gall bladder hypoplasia: search for the aetiology of a new autosomal recessive syndrome. *Diabetologia* 47, 2160–2167.
- Nenquin, M., Szollosi, A., Aguilar-Bryan, L., Bryan, J., and Henquin, J.C. (2004). Both triggering and amplifying pathways contribute to fuel-induced insulin secretion in the absence of sulfonylurea receptor-1 in pancreatic beta-cells. *J. Biol. Chem.* 279, 32316–32324.
- Otonkoski, T., Jiao, H., Kaminen-Ahola, N., Tapia-Paez, I., Ullah, M.S., Parton, L.E., Schuit, F., Quintens, R., Sipilä, I., Mayatepek, E., et al. (2007). Physical exercise-induced hypoglycemia caused by failed silencing of monocarboxylate transporter 1 in pancreatic beta cells. *Am. J. Hum. Genet.* 81, 467–474.
- Pearl, E.J., Jarikji, Z., and Horb, M.E. (2011). Functional analysis of Rfx6 and mutant variants associated with neonatal diabetes. *Dev. Biol.* 351, 135–145.
- Pullen, T.J., and Rutter, G.A. (2013). When less is more: the forbidden fruits of gene repression in the adult  $\beta$ -cell. *Diabetes Obes. Metab.* 15, 503–512.
- Pullen, T.J., Khan, A.M., Barton, G., Butcher, S.A., Sun, G., and Rutter, G.A. (2010). Identification of genes selectively disallowed in the pancreatic islet. *Islets* 2, 89–95.
- Pullen, T.J., da Silva Xavier, G., Kelsey, G., and Rutter, G.A. (2011). miR-29a and miR-29b contribute to pancreatic beta-cell-specific silencing of monocarboxylate transporter 1 (Mct1). *Mol. Cell. Biol.* 31, 3182–3194.
- Pullen, T.J., Sylow, L., Sun, G., Halestrap, A.P., Richter, E.A., and Rutter, G.A. (2012). Overexpression of monocarboxylate transporter-1 (SLC16A1) in mouse pancreatic  $\beta$ -cells leads to relative hyperinsulinism during exercise. *Diabetes* 61, 1719–1725.
- Quintens, R., Hendrickx, N., Lemaire, K., and Schuit, F. (2008). Why expression of some genes is disallowed in beta-cells. *Biochem. Soc. Trans.* 36, 300–305.

- Rahier, J., Guiot, Y., Goebbels, R.M., Sempoux, C., and Henquin, J.C. (2008). Pancreatic beta-cell mass in European subjects with type 2 diabetes. *Diabetes Obes. Metab.* *10* (Suppl 4), 32–42.
- Rosengren, A.H., Braun, M., Mahdi, T., Andersson, S.A., Travers, M.E., Shigeto, M., Zhang, E., Almgren, P., Ladenvall, C., Axelsson, A.S., et al. (2012). Reduced insulin exocytosis in human pancreatic  $\beta$ -cells with gene variants linked to type 2 diabetes. *Diabetes* *61*, 1726–1733.
- Rutter, G.A. (2004). Visualising insulin secretion. The Minkowski Lecture 2004. *Diabetologia* *47*, 1861–1872.
- Rutter, G.A. (2010). Think zinc: new roles for zinc in the control of insulin secretion. *Islets* *2*, 49–50.
- Rutter, G.A. (2014). Dorothy Hodgkin Lecture 2014. Understanding genes identified by genome-wide association studies for type 2 diabetes. *Diabet. Med.* *31*, 1480–1487.
- Schulla, V., Renström, E., Feil, R., Feil, S., Franklin, I., Gjinovci, A., Jing, X.J., Laux, D., Lundquist, I., Magnuson, M.A., et al. (2003). Impaired insulin secretion and glucose tolerance in beta cell-selective Ca(v)1.2 Ca<sup>2+</sup> channel null mice. *EMBO J.* *22*, 3844–3854.
- Sekine, N., Cirulli, V., Regazzi, R., Brown, L.J., Gine, E., Tamarit-Rodriguez, J., Girotti, M., Marie, S., MacDonald, M.J., Wollheim, C.B., et al. (1994). Low lactate dehydrogenase and high mitochondrial glycerol phosphate dehydrogenase in pancreatic beta-cells. Potential role in nutrient sensing. *J. Biol. Chem.* *269*, 4895–4902.
- Smith, S.B., Qu, H.Q., Taleb, N., Kishimoto, N.Y., Scheel, D.W., Lu, Y., Patch, A.M., Grabs, R., Wang, J., Lynn, F.C., et al. (2010). Rfx6 directs islet formation and insulin production in mice and humans. *Nature* *463*, 775–780.
- Soyer, J., Flasse, L., Raffelsberger, W., Beucher, A., Orvain, C., Peers, B., Ravassard, P., Vermot, J., Voz, M.L., Mellitzer, G., and Gradwohl, G. (2010). Rfx6 is an Ngn3-dependent winged helix transcription factor required for pancreatic islet cell development. *Development* *137*, 203–212.
- Spiegel, R., Dobbie, A., Hartman, C., de Vries, L., Ellard, S., and Shalev, S.A. (2011). Clinical characterization of a newly described neonatal diabetes syndrome caused by RFX6 mutations. *Am. J. Med. Genet.* *155A*, 2821–2825.
- Talchai, C., Xuan, S., Lin, H.V., Sussel, L., and Accili, D. (2012). Pancreatic  $\beta$  cell dedifferentiation as a mechanism of diabetic  $\beta$  cell failure. *Cell* *150*, 1223–1234.
- Taneera, J., Lang, S., Sharma, A., Fadista, J., Zhou, Y., Ahlqvist, E., Jonsson, A., Lyssenko, V., Vikman, P., Hansson, O., et al. (2012). A systems genetics approach identifies genes and pathways for type 2 diabetes in human islets. *Cell Metab.* *16*, 122–134.
- Tarasov, A.I., Semplici, F., Ravier, M.A., Bellomo, E.A., Pullen, T.J., Gilon, P., Sekler, I., Rizzuto, R., and Rutter, G.A. (2012). The mitochondrial Ca<sup>2+</sup> uniporter MCU is essential for glucose-induced ATP increases in pancreatic  $\beta$ -cells. *PLoS ONE* *7*, e39722.
- Taylor, B.L., Liu, F.-F., and Sander, M. (2013). Nkx6.1 is essential for maintaining the functional state of pancreatic beta cells. *Cell Rep.* *4*, 1262–1275.
- Terauchi, Y., Sakura, H., Yasuda, K., Iwamoto, K., Takahashi, N., Ito, K., Kasai, H., Suzuki, H., Ueda, O., Kamada, N., et al. (1995). Pancreatic beta-cell-specific targeted disruption of glucokinase gene. Diabetes mellitus due to defective insulin secretion to glucose. *J. Biol. Chem.* *270*, 30253–30256.
- Thorrez, L., Laudadio, I., Van Deun, K., Quintens, R., Hendrickx, N., Granvik, M., Lemaire, K., Schraenen, A., Van Lommel, L., Lehnert, S., et al. (2011). Tissue-specific disallowance of housekeeping genes: the other face of cell differentiation. *Genome Res.* *21*, 95–105.
- Trapnell, C., Pachter, L., and Salzberg, S.L. (2009). TopHat: discovering splice junctions with RNA-Seq. *Bioinformatics* *25*, 1105–1111.
- van Arensbergen, J., Garcia-Hurtado, J., Moran, I., Maestro, M.A., Xu, X., Van de Castele, M., Skoudy, A.L., Palassini, M., Heimberg, H., and Ferrer, J. (2010). Derepression of Polycomb targets during pancreatic organogenesis allows insulin-producing beta-cells to adopt a neural gene activity program. *Genome Res.* *20*, 722–732.
- Yang, S.N., and Berggren, P.O. (2006). The role of voltage-gated calcium channels in pancreatic beta-cell physiology and pathophysiology. *Endocr. Rev.* *27*, 621–676.
- Yoshida, S., Takakura, A., Ohbo, K., Abe, K., Wakabayashi, J., Yamamoto, M., Suda, T., and Nabeshima, Y. (2004). Neurogenin3 delineates the earliest stages of spermatogenesis in the mouse testis. *Dev. Biol.* *269*, 447–458.
- Zhang, C., Moriguchi, T., Kajihara, M., Esaki, R., Harada, A., Shimohata, H., Oishi, H., Hamada, M., Morito, N., Hasegawa, K., et al. (2005). MafA is a key regulator of glucose-stimulated insulin secretion. *Mol. Cell. Biol.* *25*, 4969–4976.

Cell Reports, Volume 9

Supplemental Information

## **Rfx6 Maintains the Functional**

## **Identity of Adult Pancreatic $\beta$ Cells**

**Julie Piccand, Perrine Strasser, David J. Hodson, Aline Meunier, Tao Ye, Céline Keime,  
Marie-Christine Birling, Guy A. Rutter, and Gérard Gradwohl**



## Supplemental Experimental Procedures

### *Mouse strains, genotyping and manipulations*

Animal experiments were supervised by G. Gradwohl (agreement N°C67-59 approved by the Direction des Services Vétérinaires, Strasbourg, France) in compliance with the European legislation on care and use of laboratory animals. Mice were maintained on C57/B6J genetic background on a 12/12 hour light/dark cycle with unlimited access to water and standard rodent chow diet. Ngn3-Cre mice are a gift from Dr. Shosei Yoshida (Yoshida et al., 2004), Ins1-CreER<sup>T2</sup> mice were generated at the ICS (Illkirch, France) in the context of the CreER Zoo. Rfx6 Floxed mice were generated in collaboration with the ICS. Genomic tail DNA was analyzed by PCR using the primers described below. Rfx6<sup>fl/fl</sup>; Ngn3-Cre (Rfx6<sup>ΔEndo</sup>) were used for analysis of the endocrine phenotype and both Rfx6<sup>fl/fl</sup> or Rfx6<sup>fl/+</sup> littermates were used as controls. Rfx6<sup>fl/fl</sup>; Ins1-CreER<sup>T2</sup> (Rfx6<sup>ΔBeta</sup>) and Rfx6<sup>fl/fl</sup> (control) 8-10 weeks old mice were both injected subcutaneously with 100μl (1mg) of tamoxifen (Sigma, dissolved in filtered corn oil at 10mg/ml) daily during 3 days. The mice were analysed 5 days, 3 weeks or 1 month after the first injection. Note that only males were used for metabolic experiments whereas a mixture of male and females was used for transcripts analysis.

### *Mouse Islet Purification*

Mouse islet purification was performed as previously described (Piccand et al., 2014). Briefly, mice were euthanized and injected with Type V Collagenase (Sigma C9263) solution directly into the common bile duct to perfuse the pancreas. Pancreas was dissected out and digested and islets were handpicked after several purification steps and used for RNA isolation or kept in culture over night before insulin secretion tests.

### *Glucose tolerance tests*

For Oral Glucose Tolerance Test (OGTT), 16-hours fasted 12 weeks-old males received glucose by intragastric gavage (2g/kg body weight of 15% D-glucose). For Intraperitoneal Glucose Tolerance Test (IPGTT), 16-hours fasted 13 weeks-old males received glucose by intraperitoneal injection (2g/kg body weight of 15% D-glucose). For both GTT, circulating blood glucose was measured in tail blood at 0, 5, 15, 30, 45, 60 and 120 minutes using Accu-Check Performa (Roche).

### *Real time PCR analysis*

Total RNA from newborn pancreas or purified islets was extracted using TRI Reagent (Invitrogen). Eventual genomic DNA contamination was removed by DNase I digestion (Roche). cDNA was synthesized using random primers (Roche) and Transcriptor Reverse Transcriptase (Roche). Quantitative PCR was carried out (LightCycler 480, Roche) with either Taqman probes (Applied Biosystems) or UPL probes and primers (Roche) as listed below. Gene expression levels were normalised to Rplp0.

### *ChIPSeq and ChIP-qPCR in Min6B1 cells*

Min6B1 cells were grown in DMEM with 25mM glucose supplemented with 15% foetal calf serum, penicillin/streptomycin and 71µM β-mercaptoethanol, in a 5% CO<sub>2</sub> incubator at 37°C. Cells were transfected with pCMV-Tag2A-3HA-Rfx6 plasmid using Lipofectamine 2000 (Invitrogen) and harvested two days later. For ChIP, after removing the medium, cells (transfected and untransfected Min6B1) were cross-linked for 10min at room temperature with 1% formaldehyde. The reaction was quenched with 125mM glycine and cells were washed with PBS and harvested by scrapping and centrifugation. Cells were resuspended in buffer I (25mM Tris HCl pH8; 1.5mM MgCl<sub>2</sub>; 10mM KCl; 0.1% NP40 (Sigma-Aldrich); Protease inhibitor cocktail (Roche)) using a Dounce homogenizer. After centrifugation, the pellet was resuspended in buffer II (1%SDS ; 10mM EDTA ; 50mM Tris HCl pH8 Protease inhibitor cocktail (Roche)). Chromatin was then sonicated using a Covaris E210 (USA) to generate chromatin fragments of 500 bp. Cell debris were removed by centrifugation at 11000g for 10min. Each ChIP was performed with 50µg of chromatin ( $4 \cdot 10^6$  cells) and a 10% aliquot was removed for the input control. Samples were pre-cleared with Protein-G-sepharose beads and next anti-HA antibody (12CA5, IGBMC) was added and incubated overnight at 4°C in buffer III (16.7mM Tris HCl pH8 ; 0.01% SDS ; 1.1% Triton ; 1.2mM EDTA ; 167mM NaCl ; Protease inhibitor cocktail (Roche)). The following day, Protein-G-sepharose beads were added during 4h. After washes in buffer IV and V (20mM Tris HCl pH8; 0.1% SDS; 1% Triton; 2mM EDTA; 150mM (IV) or 500mM (V) NaCl; Protease inhibitor cocktail (Roche)) and finally in Tris-EDTA. Bound DNA was eluted in elution buffer (1%SDS, 100mM NaHCO<sub>3</sub>) and reverse-crosslinked by proteinase K treatment overnight at 65°C. DNA was purified the following day by standard phenol-chloroform extraction. Briefly ChIPSeq was performed using an HiSeq 2500 (Illumina) sequencer and peak detection was performed using the MACS

software (Zhang et al. 2008). Peaks were then annotated using GPAT on the mouse genome (mm9). Ref Seq genes, genomic features and corresponding coordinates were downloaded from the USCC genome browser. Selected Rfx6 targets identified by ChIPSeq were confirmed by ChIP-qPCR (LightCycler 480, Roche) to determine the relative enrichment. The later experiments were performed on non-transfected Min6B1 cells using anti-Rfx6 (2767, IGBMC), and preimmune (2767, IGBMC) sera and appropriate UPL probes and primers (Roche) as listed below. ChIPSeq Data have been deposited at the Gene Expression Omnibus depository (GEO, Accession number GSE62844).

#### SUPPLEMENTAL REFERENCES

Piccand, J., Meunier, A., Merle, C., Jia, Z., Barnier, J.V., and Gradwohl, G. (2014). Pak3 promotes cell cycle exit and differentiation of beta-cells in the embryonic pancreas and is necessary to maintain glucose homeostasis in adult mice. *Diabetes* 63, 203-215.

Yoshida, S., Takakura, A., Ohbo, K., Abe, K., Wakabayashi, J., Yamamoto, M., Suda, T., and Nabeshima, Y. (2004). Neurogenin3 delineates the earliest stages of spermatogenesis in the mouse testis. *Developmental biology* 269, 447-458.

Zhang Y, Liu T, Meyer CA, Eeckhoute J, Johnson DS, Bernstein BE, Nusbaum C, Myers RM, Brown M, Li W, Liu XS. (2008). Model-based analysis of ChIP-Seq (MACS). *Genome Biol.*;9(9):R137.

### Primary and Secondary Antibodies used in this study

| Antibody Name           | Vendor/Provider                          | Dilution |
|-------------------------|------------------------------------------|----------|
| Guinea pig@Insulin      | Linco (4011-01F)                         | 1/1000   |
| Mouse@Insulin           | Sigma (I-2018)                           | 1/1000   |
| Guinea pig@Glucagon     | Linco (4031-01F)                         | 1/2000   |
| Guinea pig@PP           | Linco (4041-01F)                         | 1/1000   |
| Rat@Somatostatin        | Chemicon (MAB354)                        | 1/500    |
| Goat@chromograninA      | Santa Cruz (sc-1488)                     | 1/500    |
| Rabbit@Rfx6             | IGBMC (2766)                             | 1/500    |
| Rabbit@MafA             | Bethyl (A300-611A)                       | 1/2000   |
| Rabbit@Pdx1             | Dr. Chris Wright (Vanderbilt University) | 1/2000   |
| Rabbit@Glut2            | Chemicon (AB1342)                        | 1/500    |
| Rabbit@C-peptide 1      | BCBC (AB1044)                            | 1/2000   |
| Rabbit@C-peptide 2      | BCBC (AB1042)                            | 1/3000   |
| Rat@BrdU                | AbD Serotec (OBT0030S)                   | 1/10     |
| Donkey@rabbitDyLight549 | Jackson Immuno Research (711-505-152)    | 1/500    |
| Donkey@gpDyLight488     | Jackson Immuno Research (706-486-148)    | 1/500    |
| Donkey@goatDyLight549   | Jackson Immuno Research (705-505-147)    | 1/500    |
| Donkey@ratDyLight488    | Jackson Immuno Research (712-485-153)    | 1/500    |
| Donkey@gpDyLight549     | Jackson Immuno Research (706-505-148)    | 1/500    |
| Donkey@mouseDyLight488  | Jackson Immuno Research (715-485-150)    | 1/500    |
| Donkey@rat biotinylated | Jackson Immuno Research (712-065-153)    | 1/500    |
| Streptavidin-Alexa488   | Molecular Probes (S-11223)               | 1/500    |



### Primers or TaqMan and UPL probes used in this study

| Gene        | Forward primer or TaqMan ID     | Reverse primer            | UPL Probe | Application |
|-------------|---------------------------------|---------------------------|-----------|-------------|
| Ngn3-Cre    | ctgcagtttagcagaacttcagagggga    | atcaacgttttgttttcgga      | NA        | Genotyping  |
| ERT         | gcattaccggctcgatgcaacgagtgatgag | aggatctctagccaggcaca      | NA        | Genotyping  |
| Rfx6 flox   | gaaggtgcaccataaaaagc            | tataagccaccagggtcag       | NA        | Genotyping  |
| Cacnb2-xb   | cctgttgttttgctcctagc            | gaaggcagctggggaacta       | #33       | ChIP-PCR    |
| Cacna1c-xb1 | gcttgctgtctcctgagtttc           | cattactgcatttcctagcaaacac | #67       | ChIP-PCR    |
| Cacna1c-xb2 | gctcttgctgtgctgtaac             | tttggtgggaaagcagagat      | #105      | ChIP-PCR    |
| Ldha-xb     | tgcctctgtcagccatcag             | aagcagaaaaagcaacaacga     | #41       | ChIP-PCR    |
| Abcc8-xb    | tgaagagaccctgggttttat           | gtatgtatacaaccagcctggaaa  | #42       | ChIP-PCR    |
| Gck-xb      | ggtcaccatagaaccacagg            | caaccagggtggagtagatgtc    |           | ChIP-PCR    |
| Rfx6        | tgaggaaagagaaaactggag           | ggaaattttggcgaattgtc      | #83       | RT-qPCR     |
| MafA        | ctccagagccagggtggag             | gtacagggtcccgcctcttg      | #10       | RT-qPCR     |
| Ucn3        | gacctgagcatttccactcc            | cagaagtggcagcaggaagt      | #105      | RT-qPCR     |
| Cacna1d     | gaagctgcttgaccaagttgt           | aacttcccacggttacctc       | #9        | RT-qPCR     |
| Cacna1c     | ccaacctatctcttctca              | acatagtctgcattgcctaggat   | #71       | RT-qPCR     |
| Cacnb2      | gcaggagagccagatgga              | tcctggctcctttccatag       | #67       | RT-qPCR     |
| Ldha        | ggcactgacgcagacaag              | tgatcacctcgtaggcactg      | #12       | RT-qPCR     |
| ChgA        | Mm00514341_m1                   |                           | NA        | RT-qPCR     |
| Ins1        | Mm01259683_g1                   |                           | NA        | RT-qPCR     |
| Gck         | Mm00439129_m1                   |                           | NA        | RT-qPCR     |
| Abcc8       | Mm00803450_m1                   |                           | NA        | RT-qPCR     |
| Kcnj11      | Mm00440050_s1                   |                           | NA        | RT-qPCR     |
| Slc2a2      | Mm00446228_m1                   |                           | NA        | RT-qPCR     |
| Pcsk1       | Mm00479023_m1                   |                           | NA        | RT-qPCR     |
| Gcg         | Mm00801712_m1                   |                           | NA        | RT-qPCR     |
| Ppy         | Mm00435889_m1                   |                           | NA        | RT-qPCR     |
| Sst         | Mm00436671_m1                   |                           | NA        | RT-qPCR     |
| Arx         | Mm00545903_m1                   |                           | NA        | RT-qPCR     |
| Pax4        | Mm01159036_m1                   |                           | NA        | RT-qPCR     |
| Pdx1        | Mm00435565_m1                   |                           | NA        | RT-qPCR     |
| Nkx6.1      | Mm00454962_m1                   |                           | NA        | RT-qPCR     |
| Insm1       | Mm02581025_s1                   |                           | NA        | RT-qPCR     |
| MafB        | Mm0062748_s1                    |                           | NA        | RT-qPCR     |
| NeuroD1     | Mm00520715_m1                   |                           | NA        | RT-qPCR     |
| Pax6        | Mm00443081_m1                   |                           | NA        | RT-qPCR     |
| Ngn3        | Mm00437606_s1                   |                           | NA        | RT-qPCR     |
| Rplp0       | Mm01974474_gH                   |                           | NA        | RT-qPCR     |

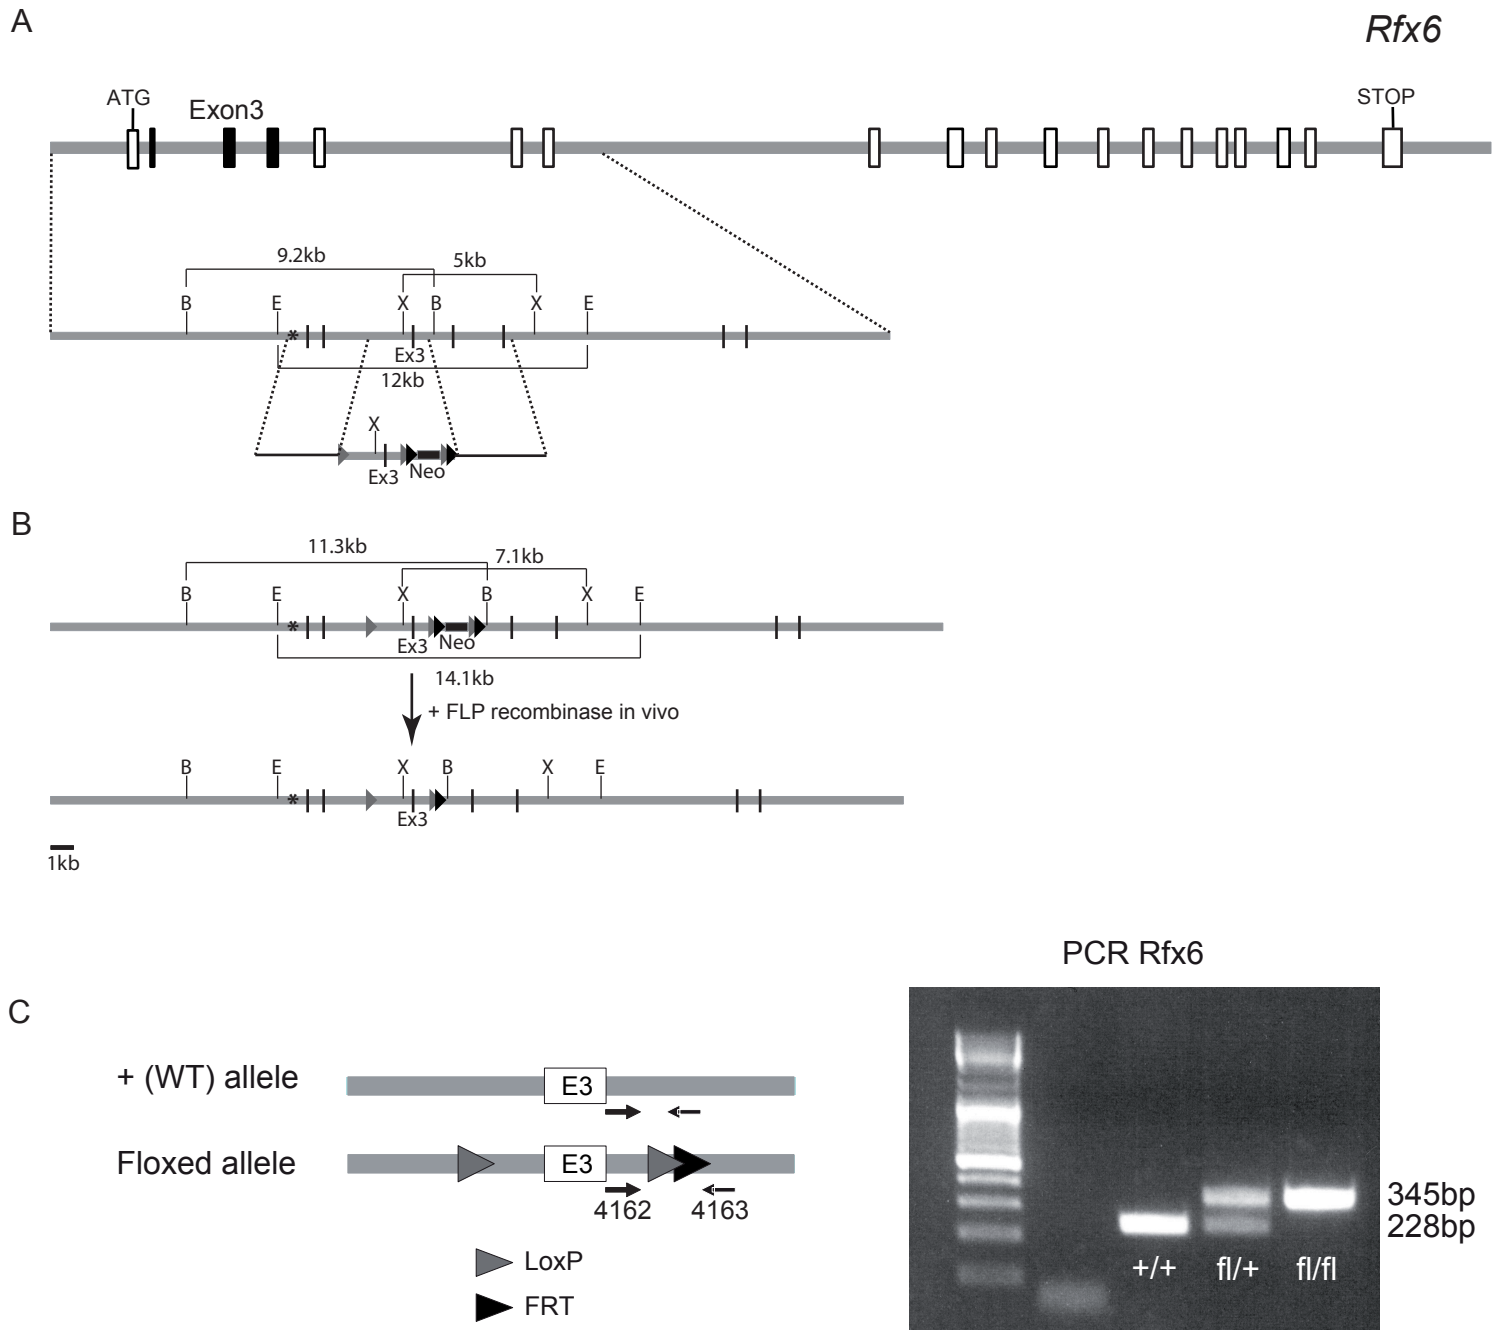

**Figure S1: Generation of mice with a conditional *Rfx6* allele used in this study related to Experimental Procedures.**

(A) Schema depicting the mouse *Rfx6* locus and targeting construct. The DNA binding domain is composed of the exons represented by black boxes. (B) Targeted *Rfx6* allele before and after the excision of the FRT flanked “Neo” selection cassette by the FLP recombinase. (A-B) Star indicates the position of the 5'- external probe used for Southern blot analysis. In B, the exons are represented as thick black bars. The Neomycin selection cassette is the black box, loxP and FRT sites are the grey and black triangles respectively. B: BsaI, E: EcoNI, X: XhoI. Scale is 1kb. (C) Genotyping strategy. Primers were designed to discriminate WT and floxed alleles (Supplemental Experimental Procedures). In the PCR gel on the right, the *Rfx6* floxed allele generates a band at 345bp and the WT allele at 228bp. Grey triangles represent loxP sites and the black triangle represents the remaining FRT site.

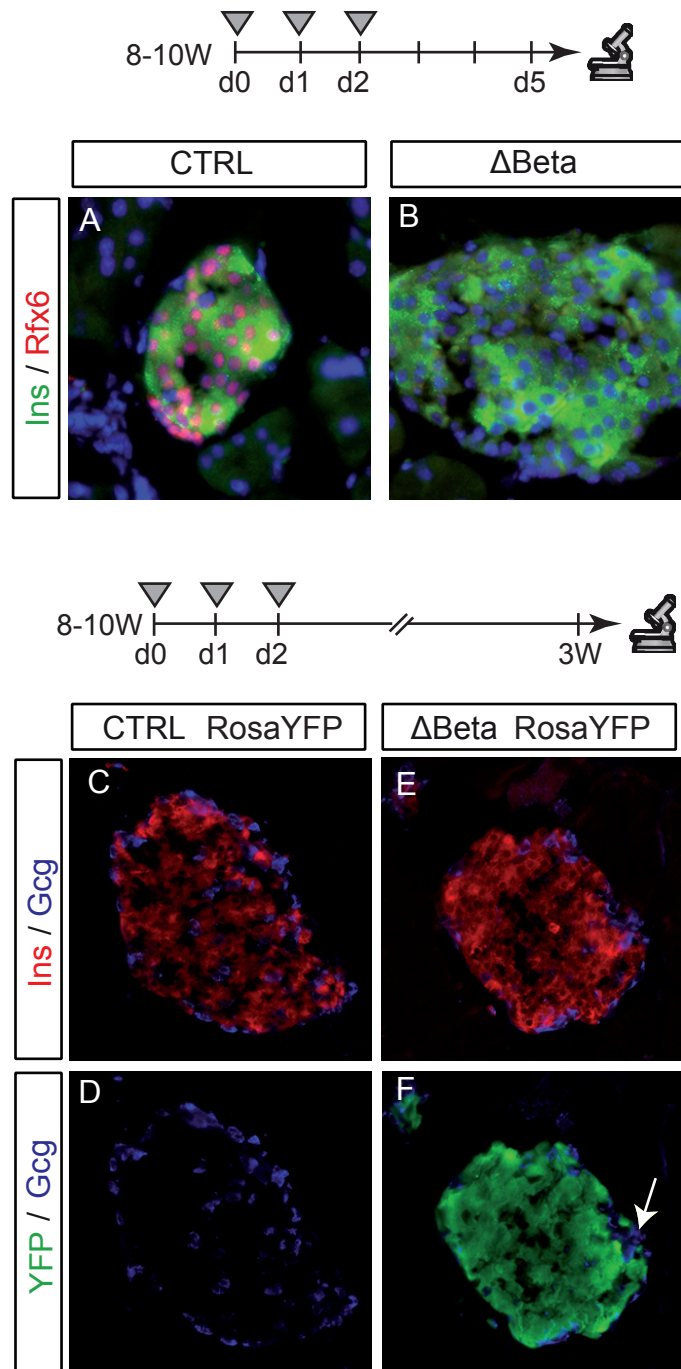

**Figure S2: Data showing the efficient and specific deletion of Rfx6 in  $\beta$ -cells of  $\Delta$ Beta mice upon tamoxifen injections related to Figure 2.** (A-B) Rfx6 immunostaining is lost in insulin(Ins)-positive  $\beta$ -cells in  $\Delta$ Beta mice (Rfx6fl/fl; Ins1-CreERT2) 5 days after tamoxifen treatment in contrast to control mice (Rfx6fl/fl). Grey triangles indicate the days of tamoxifen injections. (C-F) Tracing of the Cre activity of Ins1-CreERT2 mice in CTRL and  $\Delta$ Beta mice crossed with the Cre reporter line RosaYFP. Strong YFP immunofluorescence in  $\beta$ -cells of  $\Delta$ Beta; RosaYFP mice (F) after tamoxifen treatment in contrast to control mice (D). Note that as expected  $\alpha$ -cells (labeled by Glucagon, Gcg) are not marked by YFP (arrow in F).

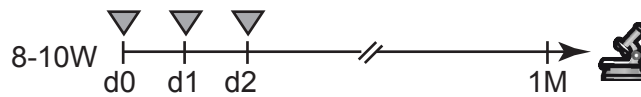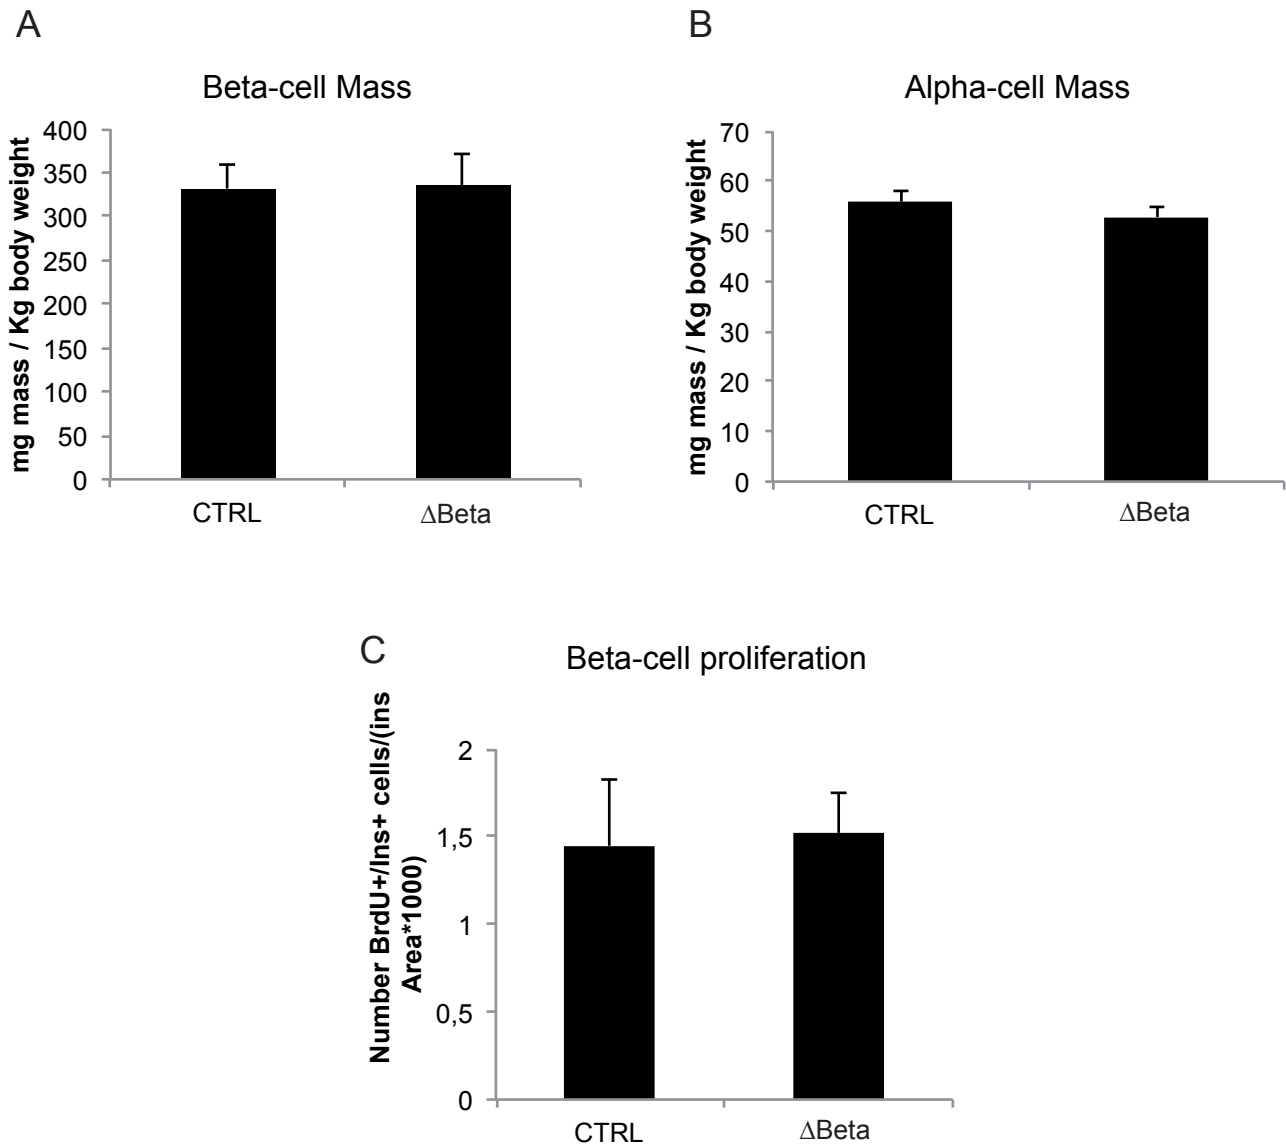

**Figure S3: Data showing that alpha and beta cell mass as well as beta cell proliferation are not altered in adult Rfx6  $\Delta$ Beta mice one month after deletion of Rfx6 in beta cells, related to Figure 3.**

Beta-cell mass (A) and alpha-cell mass (B) were quantified 1 month (M) after tamoxifen injections on n=4 control and Rfx6 $\Delta$ Beta adult mice from insulin and glucagon immunofluorescence area and pancreas weight. Beta cell mass = (Ins Area Fraction/100)\*PancreasWeight(g)\*1000)/(MouseWeight(g)/1000). Ins Area Fraction = (Ins Area) \*100 / (Dapi Area). Alpha cell mass was calculated the same way except that Gcg area was taken into account instead of Ins area. C) Controls and Rfx6 $\Delta$ Beta mice were injected with BrdU 24h, before analyses and the number of Ins-positive/BrdU-positive cells was counted on n=4 animals 1 month after tamoxifen injections and the results normalized relative to the total Insulin area. Grey triangles indicate the days of tamoxifen injections.

|                                  | Gene name | Average expression CTRL | Average Expression Rfx6 $\Delta$ beta | FC    | p-value  |
|----------------------------------|-----------|-------------------------|---------------------------------------|-------|----------|
| Rfx family members               | Rfx1      | 60.45                   | 44.22                                 | -1.35 | ns       |
|                                  | Rfx2      | 52.94                   | 38.34                                 | -1.35 | ns       |
|                                  | Rfx3      | 1333.66                 | 953.66                                | -1.37 | ns       |
|                                  | Rfx4      | 1.20                    | 1.77                                  | 1.28  | ns       |
|                                  | Rfx5      | 659.73                  | 454.97                                | -1.44 | 1.48E-03 |
|                                  | Rfx6*     | 1533.27                 | 675.14                                | -2.23 | 2.40E-13 |
|                                  | Rfx7      | 130.23                  | 118.77                                | -1.09 | ns       |
|                                  | Rfx8      | 9.89                    | 8.11                                  | -1.18 | ns       |
| Beta cell function/transcription | Ins1      | 937814.39               | 498990.79                             | -1.85 | 2.74E-07 |
|                                  | Ins2      | 1914938.84              | 1896566.74                            | -1.01 | ns       |
|                                  | Slc2a2    | 13015.56                | 9598.95                               | -1.34 | 4.43E-02 |
|                                  | Gck       | 2130.97                 | 1344.81                               | -1.57 | 8.11E-05 |
|                                  | Abcc8     | 6540.14                 | 4579.93                               | -1.41 | 1.31E-02 |
|                                  | Kcnj11    | 1197.27                 | 1056.54                               | -1.13 | ns       |
|                                  | Pcsk1     | 6639.56                 | 7178.24                               | 1.08  | ns       |
|                                  | Pcsk2     | 26677.09                | 24193.81                              | -1.10 | ns       |
|                                  | Slc30a8   | 19055.92                | 14614.63                              | -1.30 | 8.90E-03 |
|                                  | Chga      | 149119.97               | 129278.82                             | -1.15 | ns       |
|                                  | Iapp      | 766631.71               | 678124.88                             | -1.13 | ns       |
|                                  | Syp       | 3647.62                 | 4329.68                               | 1.18  | ns       |
|                                  | Sytl4     | 6151.99                 | 5810.84                               | -1.06 | ns       |
|                                  | Ucn3      | 3889.29                 | 1769.32                               | -2.12 | 2.45E-06 |
|                                  | Neurod1   | 1764.47                 | 971.99                                | -1.80 | 7.27E-09 |
|                                  | Pdx1      | 840.71                  | 623.79                                | -1.33 | ns       |
|                                  | Nkx6-1    | 1805.28                 | 1630.66                               | -1.10 | ns       |
|                                  | Isl1      | 3906.73                 | 2125.09                               | -1.81 | 1.54E-06 |
|                                  | Pax6      | 6600.11                 | 3210.75                               | -2.03 | 7.73E-14 |
|                                  | Insm1     | 1043.29                 | 856.28                                | -1.21 | ns       |
|                                  | Mafa      | 2701.13                 | 1948.29                               | -1.33 | ns       |
|                                  | Mafb      | 271.77                  | 202.74                                | -1.33 | ns       |
|                                  | Mnx1      | 225.32                  | 134.05                                | -1.66 | 2.01E-05 |
|                                  | Myt1      | 1994.96                 | 1037.75                               | -1.87 | 8.57E-05 |
|                                  | Neurog3   | 41.81                   | 29.20                                 | -1.33 | ns       |
|                                  | Nkx2-2    | 1110.44                 | 878.78                                | -1.23 | ns       |
|                                  | Sox4      | 2551.92                 | 2895.45                               | 1.12  | ns       |
|                                  | Foxa2     | 1550.68                 | 1341.41                               | -1.15 | ns       |

**Table S1 : Expression of selected genes in Rfx6 $\Delta$ beta islets related to Figure 2 and 4**  
RNA Seq data on control and Rfx6 $\Delta$ beta mouse islets (n=3), 5 days after Tamoxifen treatment. FC: mutant /controls (CTRL); ns: non significant p value > 0.05; Average expression: normalized read counts divided by gene length. \* Only exon-3 of Rfx6 is deleted in Rfx6 $\Delta$ beta mouse islets. Remaining exons (Rfx6 has 19 exons) can be transcribed and thus identified as "Rfx6" mRNA in the RNA sequencing experiments.

| Gene name       | Description                                                    | Fold Change Mutant/ctrl | p-value  | Average expression (controls) | Average expression (mutants) |
|-----------------|----------------------------------------------------------------|-------------------------|----------|-------------------------------|------------------------------|
| <b>Cacna1e</b>  | calcium channel, voltage-dependent, R type, alpha 1E subunit   | -4.90                   | 4,89E-09 | 46.15                         | 7.09                         |
| <b>Cacnb2</b>   | calcium channel, voltage-dependent, beta 2 subunit             | -2.10                   | 3,79E-08 | 876.24                        | 407.18                       |
| <b>Cacna1c</b>  | calcium channel, voltage-dependent, L type, alpha 1C subunit   | -2.17                   | 1,54E-05 | 337.79                        | 148.65                       |
| <b>Cacna1b</b>  | calcium channel, voltage-dependent, N type, alpha 1B subunit   | -1.82                   | 6,28E-04 | 101.02                        | 53.66                        |
| <b>Cacna1a</b>  | calcium channel, voltage-dependent, P/Q type, alpha 1A subunit | -1.82                   | 1,87E-03 | 2153.91                       | 1129.47                      |
| <b>Cacna2d3</b> | calcium channel, voltage-dependent, alpha2/delta subunit 3     | -2.10                   | 2,78E-03 | 64.74                         | 27.72                        |
| <b>Cacna1d</b>  | calcium channel, voltage-dependent, L type, alpha 1D subunit   | -1.66                   | 3,52E-03 | 490.83                        | 287.35                       |
| <b>Cacnb1</b>   | calcium channel, voltage-dependent, beta 1 subunit             | -1.54                   | 7,14E-03 | 184.25                        | 116.99                       |
| <b>Cacnb3</b>   | calcium channel, voltage-dependent, beta 3 subunit             | -1.15                   | ns       | 445.49                        | 387.15                       |
| <b>Cacna2d1</b> | calcium channel, voltage-dependent, alpha2/delta subunit 1     | -1.17                   | ns       | 1232.37                       | 1051.85                      |
| <b>Cacng8</b>   | calcium channel, voltage-dependent, gamma subunit 8            | 1.51                    | ns       | 0.88                          | 4.36                         |
| <b>Cacna1s</b>  | calcium channel, voltage-dependent, L type, alpha 1S subunit   | 1.48                    | ns       | 0.64                          | 1.23                         |
| <b>Cacna1h</b>  | calcium channel, voltage-dependent, T type, alpha 1H subunit   | -1.14                   | ns       | 205.02                        | 178.96                       |
| <b>Cacng1</b>   | calcium channel, voltage-dependent, gamma subunit 1            | 1.24                    | ns       | 0.42                          | 1.51                         |
| <b>Cacna1i</b>  | calcium channel, voltage-dependent, alpha 1I subunit           | -1.24                   | ns       | 102.85                        | 77.25                        |
| <b>Cacng2</b>   | calcium channel, voltage-dependent, gamma subunit 2            | -1.25                   | ns       | 3.05                          | 2.24                         |
| <b>Cacnb4</b>   | calcium channel, voltage-dependent, beta 4 subunit             | 1.23                    | ns       | 1.35                          | 1.73                         |
| <b>Cacng4</b>   | calcium channel, voltage-dependent, gamma subunit 4            | -1.20                   | ns       | 36.70                         | 29.48                        |
| <b>Cacna2d2</b> | calcium channel, voltage-dependent, alpha 2/delta subunit 2    | -1.18                   | ns       | 17.75                         | 14.30                        |
| <b>Cacna1g</b>  | calcium channel, voltage-dependent, T type, alpha 1G subunit   | -1.09                   | ns       | 6.20                          | 5.57                         |
| <b>Cacng7</b>   | calcium channel, voltage-dependent, gamma subunit 7            | 1.13                    | ns       | 6.11                          | 6.94                         |
| <b>Cacna2d4</b> | calcium channel, voltage-dependent, alpha 2/delta subunit 4    | 1.06                    | ns       | 5.23                          | 5.67                         |
| <b>Cacna1f</b>  | calcium channel, voltage-dependent, alpha 1F subunit           | -1.05                   | ns       | 9.07                          | 8.54                         |
| <b>Cacng5</b>   | calcium channel, voltage-dependent, gamma subunit 5            | -1.01                   | ns       | 1.88                          | 1.84                         |
| <b>Cacng3</b>   | calcium channel, voltage-dependent, gamma subunit 3            | 1.01                    | ns       | 1.92                          | 1.90                         |

**Table S2: Down-regulation of voltage-dependent calcium channel (VDCC) genes in beta cells lacking Rfx6, related to Figure 5.**

Table showing the expression (RNASeq) of voltage-dependent calcium channel genes in control (ctrl) and Rfx6  $\Delta$ beta mouse islets 5 days after Tamoxifen treatment. FC: mutant /control, ns: non specific p<0.05 . Average expression: normalized read counts divided by gene length.



| Gene name            | Description                                                           | Fold Change | Average expression controls | Average expression RfX6 Δbeta |
|----------------------|-----------------------------------------------------------------------|-------------|-----------------------------|-------------------------------|
| <b>MyI9</b>          | myosin, light polypeptide 9, regulatory                               | 5.73        | 311.40                      | 2431.82                       |
| <b>Ogn #</b>         | Osteoglycin                                                           | 5.54        | 16.63                       | 148.53                        |
| <b>Ly6c2</b>         | lymphocyte antigen 6 complex, locus C2                                | 5.43        | 2.56                        | 69.89                         |
| <b>Islr #</b>        | immunoglobulin superfamily containing leucine-rich repeat             | 5.36        | 5.53                        | 45.81                         |
| <b>Tgm2</b>          | transglutaminase 2, C polypeptide                                     | 5.18        | 254.50                      | 1972.31                       |
| <b>Pdgfra (1)</b>    | platelet derived growth factor receptor, alpha polypeptide            | 5.13        | 20.74                       | 234.54                        |
| <b>Gas1 #</b>        | growth arrest specific 1                                              | 4.76        | 14.30                       | 151.42                        |
| <b>Gda</b>           | guanine deaminase                                                     | 4.72        | 91.06                       | 873.70                        |
| <b>Pcolce #</b>      | procollagen C-endopeptidase enhancer protein                          | 4.47        | 69.00                       | 445.47                        |
| <b>Igfbp4 (1) #</b>  | insulin-like growth factor binding protein 4                          | 4.15        | 373.64                      | 2227.03                       |
| <b>MyIk #</b>        | myosin, light polypeptide kinase                                      | 3.99        | 65.44                       | 308.06                        |
| <b>Cd302 (1)</b>     | CD302 antigen                                                         | 3.85        | 28.43                       | 161.11                        |
| <b>Mgst1 #</b>       | microsomal glutathione S-transferase 1                                | 3.85        | 125.96                      | 748.69                        |
| <b>Cxcl12 (1)</b>    | chemokine (C-X-C motif) ligand 12                                     | 3.76        | 49.09                       | 229.09                        |
| <b>Arhgdib #</b>     | Rho, GDP dissociation inhibitor (GDI) beta                            | 3.70        | 51.28                       | 309.85                        |
| <b>Itih5</b>         | inter-alpha (globulin) inhibitor H5                                   | 3.58        | 14.48                       | 73.07                         |
| <b>Tst #</b>         | thiosulfate sulfurtransferase, mitochondrial                          | 3.56        | 42.63                       | 184.24                        |
| <b>Slc16a1 (1) #</b> | solute carrier family 16 (monocarboxylic acid transporters), member 1 | 3.51        | 16.55                       | 85.38                         |
| <b>Fxyd1 #</b>       | FXDY domain-containing ion transport regulator 1                      | 3.39        | 35.07                       | 152.43                        |
| <b>Ldha (1) #</b>    | lactate dehydrogenase A                                               | 3.11        | 657.33                      | 2693.39                       |
| <b>Fcgrt #</b>       | Fc receptor, IgG, alpha chain transporter                             | 3.11        | 76.96                       | 333.51                        |
| <b>Maf #</b>         | avian musculoaponeurotic fibrosarcoma (v-maf) AS42 oncogene homolog   | 3.06        | 15.36                       | 79.90                         |
| <b>Sult1a1</b>       | sulfotransferase family 1A, phenol-preferring, member 1               | 3.02        | 83.74                       | 356.79                        |
| <b>Ddah1 #</b>       | dimethylarginine dimethylaminohydrolase 1                             | 2.94        | 6.70                        | 24.03                         |
| <b>Gas6 #</b>        | growth arrest specific 6                                              | 2.91        | 228.93                      | 793.31                        |
| <b>Selenbp1</b>      | selenium binding protein 1                                            | 2.80        | 35.91                       | 129.27                        |
| <b>Car2 #</b>        | carbonic anhydrase 2                                                  | 2.64        | 11.34                       | 43.97                         |
| <b>Gucy1a3 #</b>     | guanylate cyclase 1, soluble, alpha 3                                 | 2.51        | 55.33                       | 149.02                        |
| <b>Cat #</b>         | catalase                                                              | 2.50        | 153.94                      | 428.03                        |
| <b>NdrG2</b>         | N-myc downstream regulated gene 2                                     | 2.48        | 45.05                       | 121.75                        |
| <b>Nfib #</b>        | nuclear factor I/B                                                    | 2.45        | 133.27                      | 345.35                        |
| <b>Yap1</b>          | yes-associated protein 1                                              | 2.43        | 124.39                      | 348.35                        |
| <b>Lmo4 #</b>        | LIM domain only 4                                                     | 2.40        | 59.70                       | 161.98                        |
| <b>Tns1 #</b>        | tensin 1                                                              | 2.31        | 71.00                       | 168.93                        |
| <b>Ly6a</b>          | lymphocyte antigen 6 complex, locus A                                 | 2.23        | 332.03                      | 833.66                        |
| <b>Smad3 #</b>       | MAD homolog 3 (Drosophila)                                            | 2.22        | 346.47                      | 795.26                        |
| <b>Hbb-b1</b>        | hemoglobin, beta adult major chain                                    | 2.21        | 426.06                      | 1331.47                       |
| <b>Hbb-b2</b>        | hemoglobin, beta adult minor chain                                    | 2.20        | 73.60                       | 234.06                        |
| <b>Parp3</b>         | poly (ADP-ribose) polymerase family, member 3                         | 2.15        | 47.28                       | 115.77                        |
| <b>Fgf1 #</b>        | fibroblast growth factor 1                                            | 2.12        | 601.17                      | 1325.74                       |
| <b>Acot7 #</b>       | acyl-CoA thioesterase 7                                               | 2.03        | 73.13                       | 161.04                        |
| <b>Zfp3611 #</b>     | zinc finger protein 36, C3H type-like 1                               | 2.03        | 41.87                       | 91.95                         |
| <b>Oat (1) #</b>     | ornithine aminotransferase                                            | 2.03        | 256.77                      | 576.58                        |
| <b>Galm #</b>        | galactose mutarotase                                                  | 1.94        | 19.39                       | 39.90                         |
| <b>Ly6c1</b>         | lymphocyte antigen 6 complex, locus C1                                | 1.81        | 326.64                      | 626.69                        |
| <b>Ak3</b>           | adenylate kinase 3                                                    | 1.78        | 635.52                      | 1161.10                       |

|                       |                                                                |      |         |         |
|-----------------------|----------------------------------------------------------------|------|---------|---------|
| <b>Mgll #</b>         | monoglyceride lipase                                           | 1.70 | 462.81  | 831.93  |
| <b>Bloc1s1 #</b>      | biogenesis of lysosome-related organelles complex-1, subunit 1 | 1.70 | 121.03  | 215.11  |
| <b>Nola2 (Nhp2) #</b> | NHP2 ribonucleoprotein homolog (yeast)                         | 1.64 | 175.93  | 299.91  |
| <b>Plec #</b>         | plectin                                                        | 1.50 | 190.71  | 286.16  |
| <b>Zyx</b>            | zyxin                                                          | 1.40 | 57.71   | 82.45   |
| <b>C1qbp</b>          | complement component 1, q subcomponent binding protein         | 1.43 | 282.95  | 406.83  |
| <b>Uqcrb</b>          | ubiquinol-cytochrome c reductase binding protein               | 1.34 | 1598.62 | 2152.23 |
| <b>Ndrp4</b>          | N-myc downstream regulated gene 4                              | 1.22 | 761.90  | 935.42  |
| <b>Cox5a</b>          | cytochrome c oxidase, subunit Va                               | ns   | 748.60  | 1008.20 |
| <b>Criz1 (Utp3) #</b> | small subunit processome component, homolog (S. cerevisiae)    | ns   | 365.34  | 407.60  |
| <b>Higd1a #</b>       | HIG1 domain family, member 1A                                  | ns   | 110.53  | 126.48  |
| <b>Rpl24 #</b>        | ribosomal protein L24                                          | ns   | 3565.55 | 3452.93 |
| <b>Rpl36 #</b>        | ribosomal protein L36                                          | ns   | 151.04  | 144.09  |
| <b>Hba-a1</b>         | hemoglobin alpha, adult chain 1                                | ns   | 94.77   | 207.23  |
| <b>Hba-a2 #</b>       | hemoglobin alpha, adult chain 2                                | ns   | 18.56   | 87.10   |
| <b>Abca8a</b>         | ATP-binding cassette, sub-family A (ABC1), member 8a           | ns   | 193.17  | 296.45  |
| <b>Mgst3 #</b>        | microsomal glutathione S-transferase 3                         | ns   | 215.97  | 306.02  |
| <b>Gsta4 #</b>        | glutathione S-transferase, alpha 4                             | ns   | 65.32   | 104.21  |
| <b>Fam59a #</b>       | family with sequence similarity 59, member A                   | ns   | 15.55   | 19.85   |
| <b>Aspa</b>           | Aspartoacylase                                                 | ns   | 33.72   | 30.19   |
| <b>Zdhhc9</b>         | zinc finger, DHHC domain containing 9                          | ns   | 45.10   | 51.59   |

**Table S3: Rfx6 represses disallowed genes (data related to Figure 6)**

Disallowed genes as defined by Pullen et al Islet 2010 and Thorrez et al Genome Research 2010 are up-regulated when Rfx6 is deleted in adult beta-cells (RNA Seq data on control and  $\Delta$ beta mouse islets 5 days after Tamoxifen treatment. FC: mutant/controls, ns, non significant p value > 0.05. Average expression: normalized read counts divided by gene length. (1) disallowed genes identified in both studies. # potential direct target of Rfx6 based on the identification of a peak in the vicinity of these genes in Rfx6 ChIPSeq experiments performed in Min6B1 cells (see Methods).
